# Supplementary material
Source: Research Square preprint supplement (doi:10.21203/rs.3.rs-9577173/v1)
Supplement: Supplementary file 1 [file 0cb22e5979197880c0425ba9.pdf]

# Top 25 species correlated with *Photobacterium damsela*

*Photobacterium angustum*  
*Photobacterium gaetbulicola*  
*Vibrio mediterranei*  
*Aliivibrio fischeri*  
*Vibrio ponticus*  
*Shewanella marisflavi*  
*Vibrio nereis*  
*Kocuria palustris*  
*Sphingobacterium faecium*  
*Bradyrhizobium elkanii*  
*Tessaracoccus flavescens*  
*Brevundimonas bullata*  
*Stenotrophomonas rhizophila*  
*Endozoicomonas montiporae*  
*Marinicella litoralis*  
*Altererythrobacter namhicola*  
*Brochothrix thermosphacta*  
*Carnobacterium inhibens*  
*Cobetia marina*  
*Psychrobacter faecalis*  
*Psychrobacter cryohalolentis*  
*Psychrobacter alimentarius*  
*Flavobacterium phocarum*  
*Psychrobacter cibarius*  
*Psychrobacter maritimus*

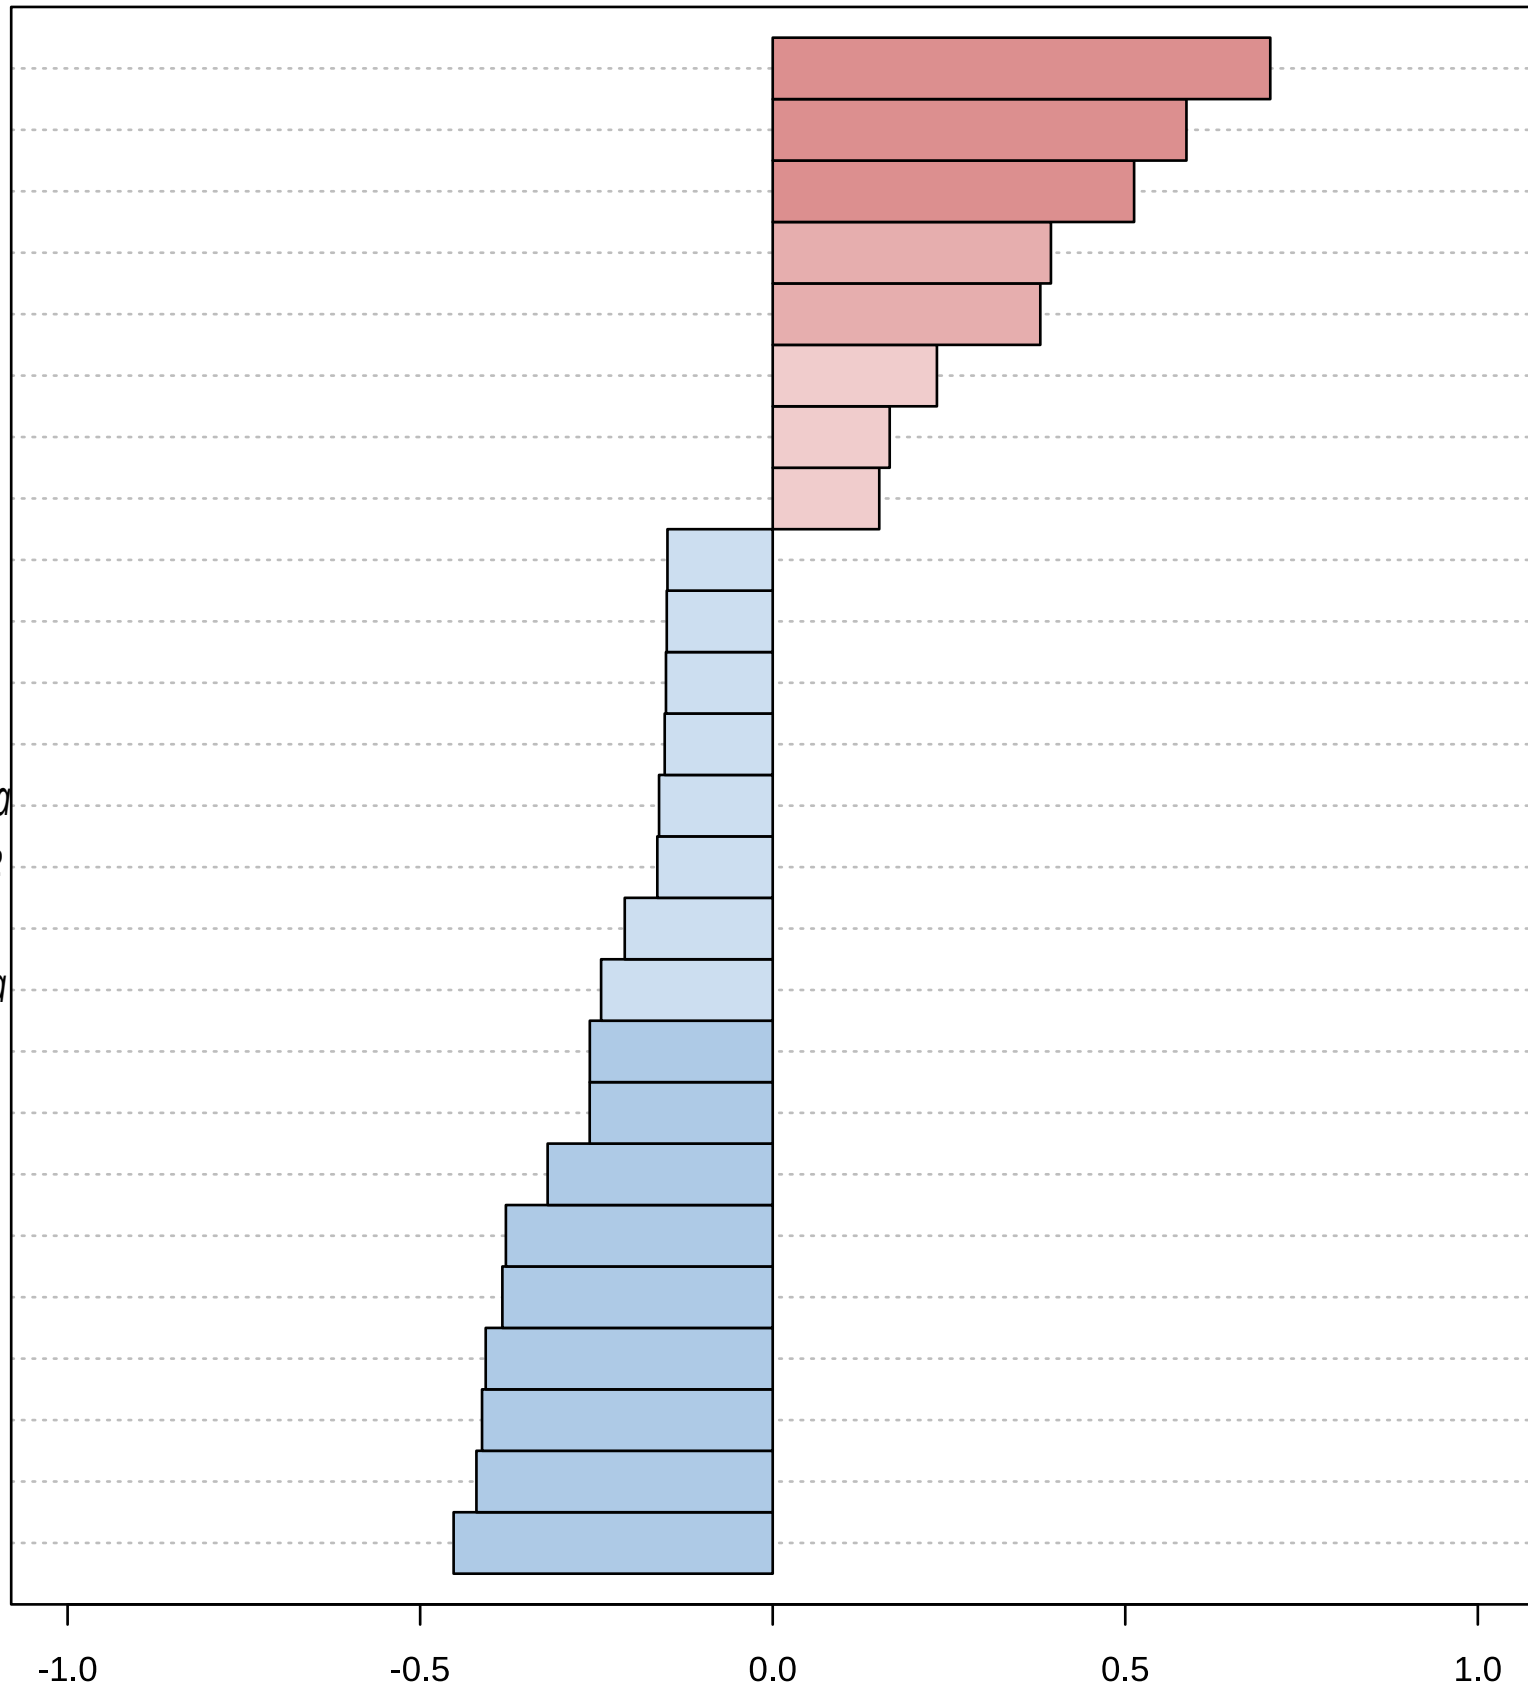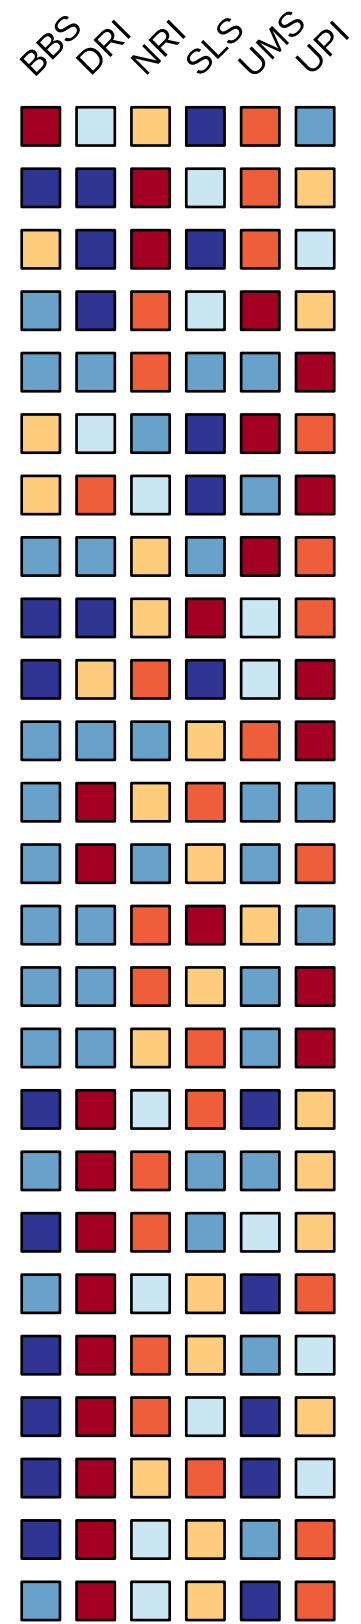

Correlation Coefficients

High

Low
