# Supplementary material
Source: Research Square preprint supplement (doi:10.21203/rs.3.rs-9577173/v1)
Supplement: Supplementary file 5 [file 31cd26499a7de1040a14262f.docx]

**Supplementary 1 Comparison of Individual and Pooled samples, Bray-Curtis Dissimilarity Index.** P< 0.05.

**Supplementary 2 Comparison of Individual and Pooled samples, Jaccard Similarity Index**. P ~ 0.08.

**Supplementary 3 Comparison of gill microbiome composition between years of sampling.** PERMANOVA: F: 9.6005; R-squared: 0.23454; P<0.001 NMDS stress = 0.23285.

**Supplementary 4 Comparison of gill microbiome composition between seasons of sampling.** PERMANOVA: F: 9.6344; R-squared: 0.091205; P<0.001 NMDS stress = 0.23285.

**Supplementary 5 Temporal changes in relative abundance of 4 genera of interest in gills of Nemipterus randalli.**

**Supplementary 6 Temporal changes in relative abundance of 4 genera of interest in gills of *Saurida lessepsianus*.**

**Supplementary 7 Relative abundance oftop10 bacterial species found in *Nemipterus randalli*, plotted along years of sampling.**The graph presents groups from right to left (largest to smallest), separating them by color. “Not_Assigned” group refers to bacteria which where not identified on the genus level. “Others” group refers to genera that were identified, but had fewer than 500 reads, and so were merged together.

**Supplementary 8 Comparison of gill microbiome composition between years of sampling, belonging to Nemipterus randalli.** PERMANOVA: F: 6.1347; R-squared: 0.32061; P<0.001 NMDS stress = 0.19005.

**Supplementary 9 A correlation graph of *Photobacterium damselae*, presenting the top 25 (by abundance) species.** The y-axis of the bar plot lists species names related to *P. damselae*, going from the most positively correlated ones at the top to the most negatively correlated ones below. Red bars show species whose abundance **increases** as *P. damselae* abundance increases. Blue bars show species whose abundance **decreases** as *P. damselae* abundance increases. The X-axis presents the Correlation Coefficient values, using Spearman's *ρ*. In the heatmap on the right side, columns correspond with the host fish species, while rows represent the relative abundance of bacterial species within that host.

**Supplementary 10 A comparison of the Pathogenic/Non-pathogenic ratios per host species.** Values represent relative abundance of potential pathogenic species identified out of all ASVs associated with genera appearing in Table 2, and certain fish species.

**Supplementary 11 A comparison of the Pathogenic/Non-pathogenic ratios per genera of interest**. Values represent relative abundance of potential pathogenic species identified out of all ASVs associated with a certain genus.

**Supplementary 12** **A *Photobacterium* related ASVs phylogenetic tree**. A cutoff of 0.7 was made for nodes, thus any lower value is not presented. Triangular shaped tips represent sequences found to be practically identical. Reference sequences include their GenBank accession numbers. The scale bar represents 2.0 nucleotide substitution per site. In this tree, we can see the genotype analysis detected in this study compared to the genotype from the literature. This comparison was made in order to further confirm suspected pathogenic sequence identities.

**Supplementary 13** **A *Psychrobacter* related ASVs phylogenetic tree**. A cutoff of 0.7 was made for nodes, thus any lower value is not presented. Triangular shaped tips represent sequences found to be practically identical. Reference sequences include their GenBank accession numbers. The scale bar represents 2.0 nucleotide substitution per site. In this tree, we can see the genotype analysis detected in this study compared to the genotype from the literature. This comparison was made in order to further confirm suspected pathogenic sequence identities

**Supplementary 14** **A *Shewanella* related ASVs phylogenetic tree**. A cutoff of 0.7 was made for nodes, thus any lower value is not presented. Triangular shaped tips represent sequences found to be practically identical. Reference sequences include their GenBank accession numbers. The scale bar represents 3.0 nucleotide substitution per site. In this tree, we can see the genotype analysis detected in this study compared to the genotype from the literature. This comparison was made in order to further confirm suspected pathogenic sequence identities.

**Supplementary 15** **A *Vibrio* related ASVs phylogenetic tree**. A cutoff of 0.7 was made for nodes, thus any lower value is not presented. Triangular shaped tips represent sequences found to be practically identical. Reference sequences include their GenBank accession numbers. The scale bar represents 2.0 nucleotide substitution per site. In this tree, we can see the genotype analysis detected in this study compared to the genotype from the literature. This comparison was made in order to further confirm suspected pathogenic sequence identities.

**Supplementary 16 Community structure of fish gill samples by Simpson Index.** Data clustered by fish species. P: 0.07; Kruskal-Wallis statistic: 10.089

**Supplementary 17 Community structure of fish gill samples by Shannon Index.** Data clustered by fish species. P: 0.01; Kruskal-Wallis statistic: 14.546

**Supplementary 18 Temporal changes in relative abundance of 4 genera of interest in gills of *Boops boops*.**

**Supplementary 19 Temporal changes in relative abundance of 4 genera of interest in gills of *Decapterus russelli*.**

**Supplementary 20 Temporal changes in relative abundance of 4 genera of interest in gills of *Upeneus moluccensis*.**

**Supplementary 21 Temporal changes in relative abundance of 4 genera of interest in gills of *Upeneus pori*.**
