# Supplementary material
Source: Research Square preprint supplement (doi:10.21203/rs.3.rs-9577173/v1)
Supplement: Supplementary file 8 [file 67c0f244a8417f860f9f6823.pdf]

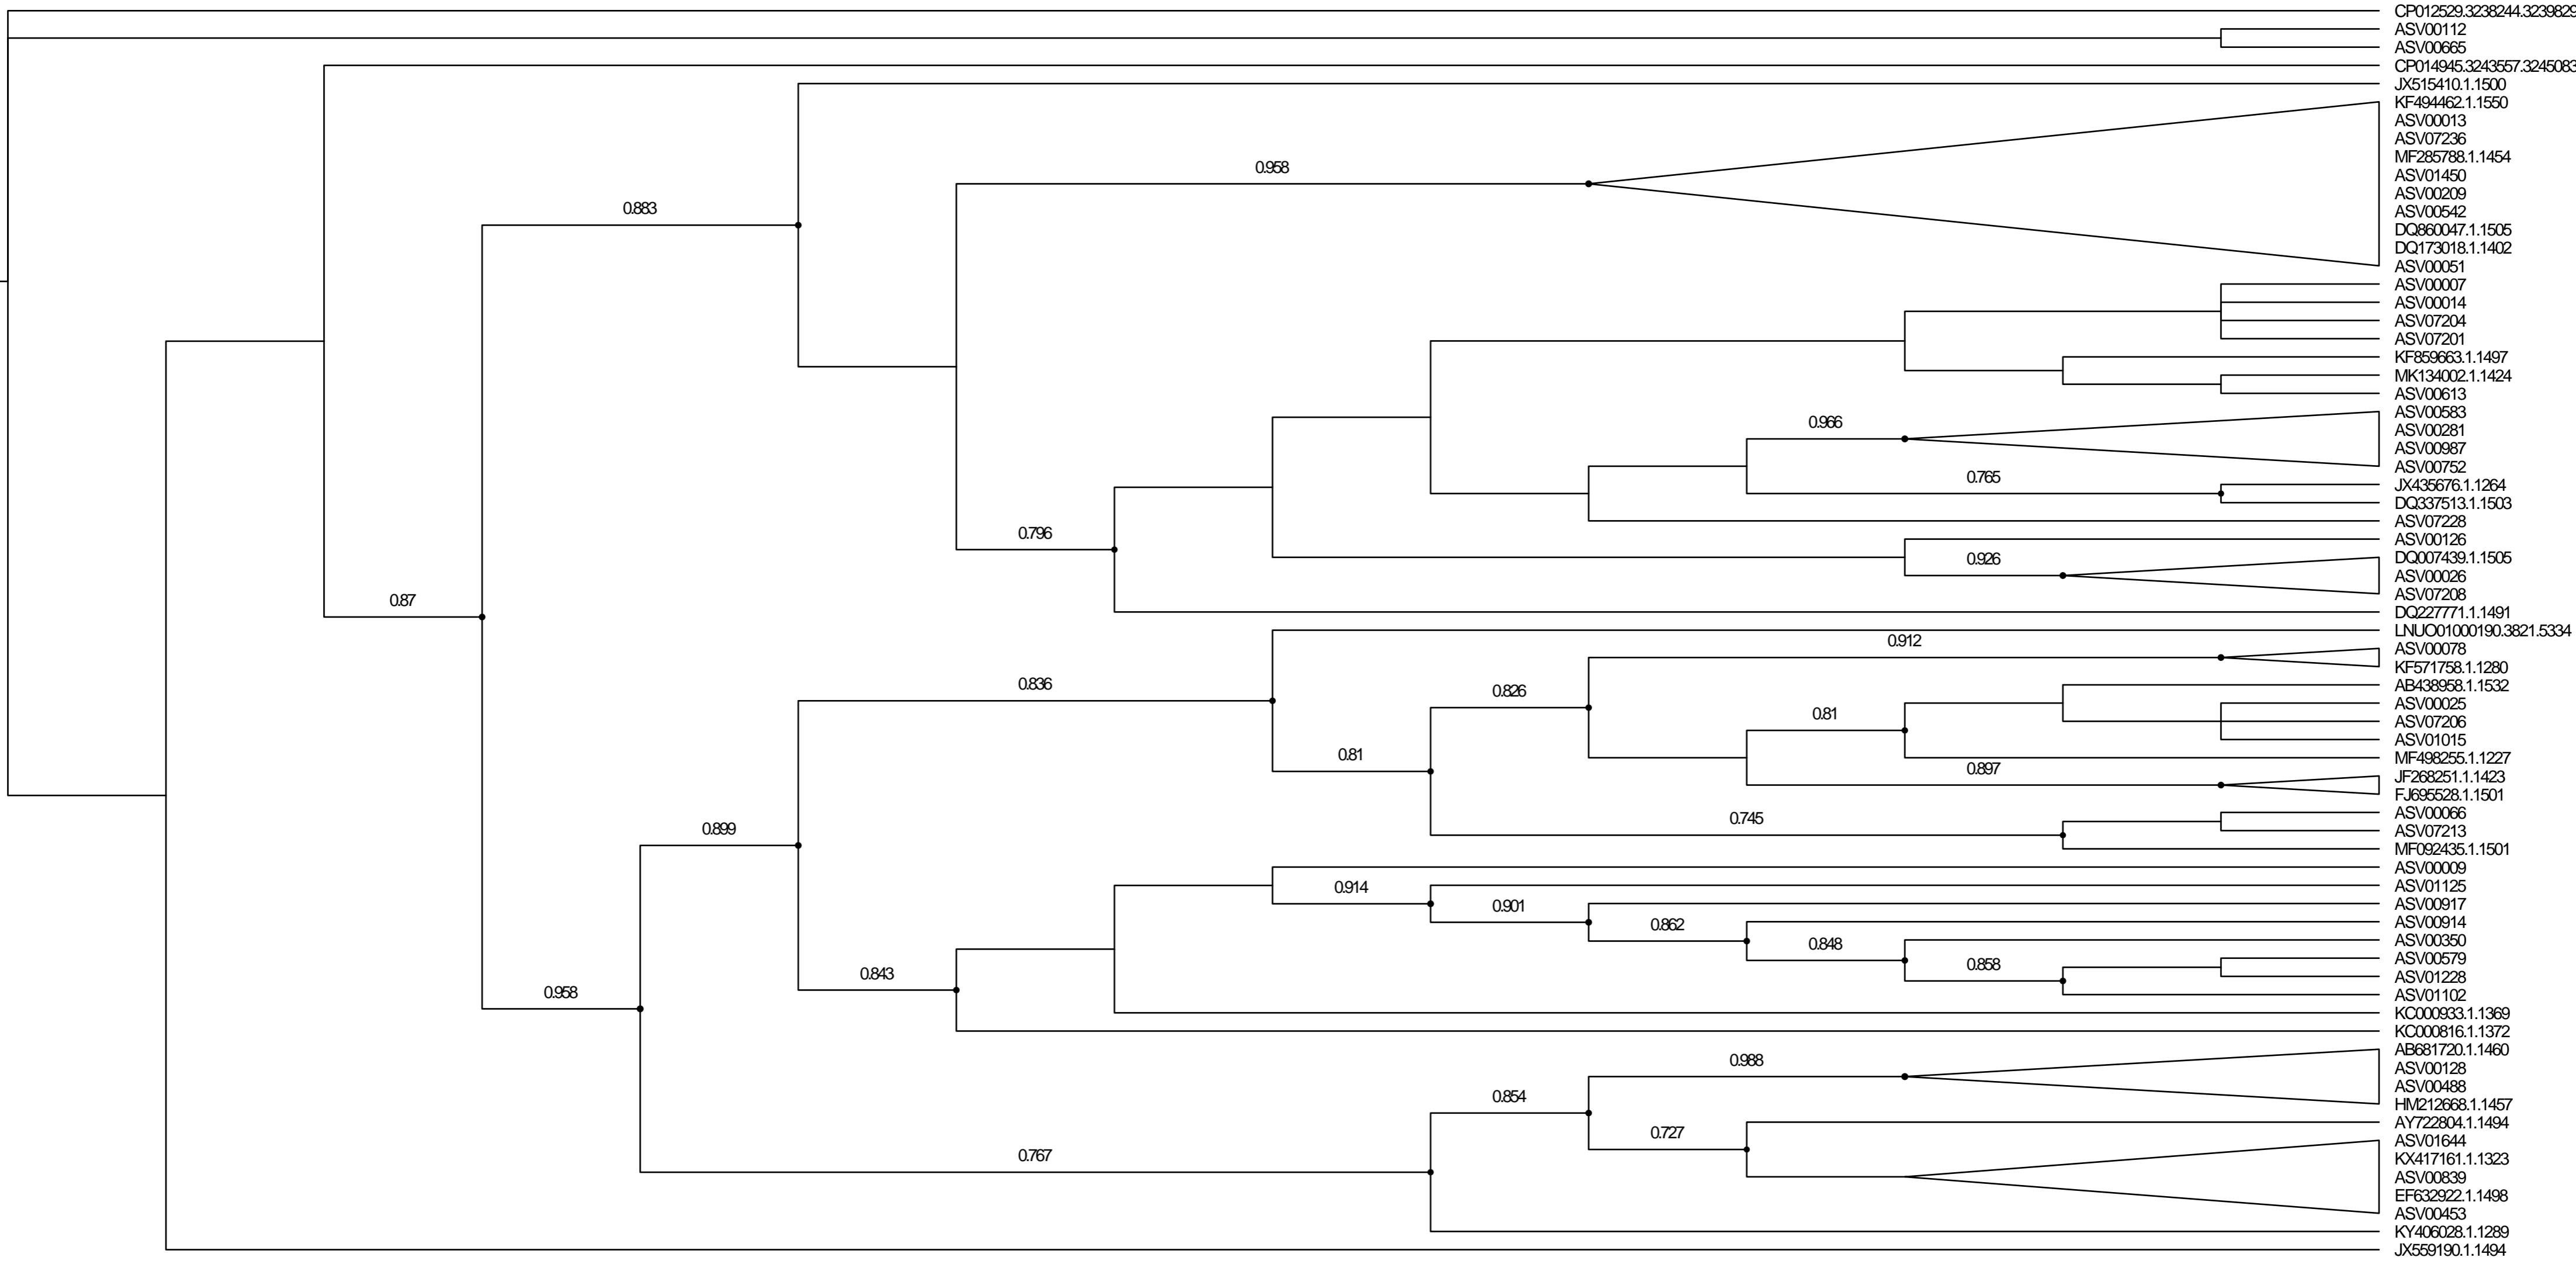

- CP012529.3238244.3239829
- ASV00112
- ASV00665
- CP014945.3243557.3245083
- JX515410.1.1500
- KF494462.1.1550
- ASV00013
- ASV07236
- MF285788.1.1454
- ASV01450
- ASV00209
- ASV00542
- DQ860047.1.1505
- DQ173018.1.1402
- ASV00051
- ASV00007
- ASV00014
- ASV07204
- ASV07201
- KF859663.1.1497
- MK134002.1.1424
- ASV00613
- ASV00583
- ASV00281
- ASV00987
- ASV00752
- JX435676.1.1264
- DQ337513.1.1503
- ASV07228
- ASV00126
- DQ007439.1.1505
- ASV00026
- ASV07208
- DQ227771.1.1491
- LNLU001000190.3821.5334
- ASV00078
- KF571758.1.1280
- AB438958.1.1532
- ASV00025
- ASV07206
- ASV01015
- MF498255.1.1227
- JF268251.1.1423
- FJ695528.1.1501
- ASV00066
- ASV07213
- MF092435.1.1501
- ASV00009
- ASV01125
- ASV00917
- ASV00914
- ASV00350
- ASV00579
- ASV01228
- ASV01102
- KC000933.1.1369
- KC000816.1.1372
- AB681720.1.1460
- ASV00128
- ASV00488
- HM212668.1.1457
- AY722804.1.1494
- ASV01644
- KX417161.1.1323
- ASV00839
- EF632922.1.1498
- ASV00453
- KY406028.1.1289
- JX559190.1.1494
