# Supplementary material
Source: Research Square preprint supplement (doi:10.21203/rs.3.rs-9577173/v1)
Supplement: Supplementary file 12 [file ae014210f30c67ef3b336484.pdf]

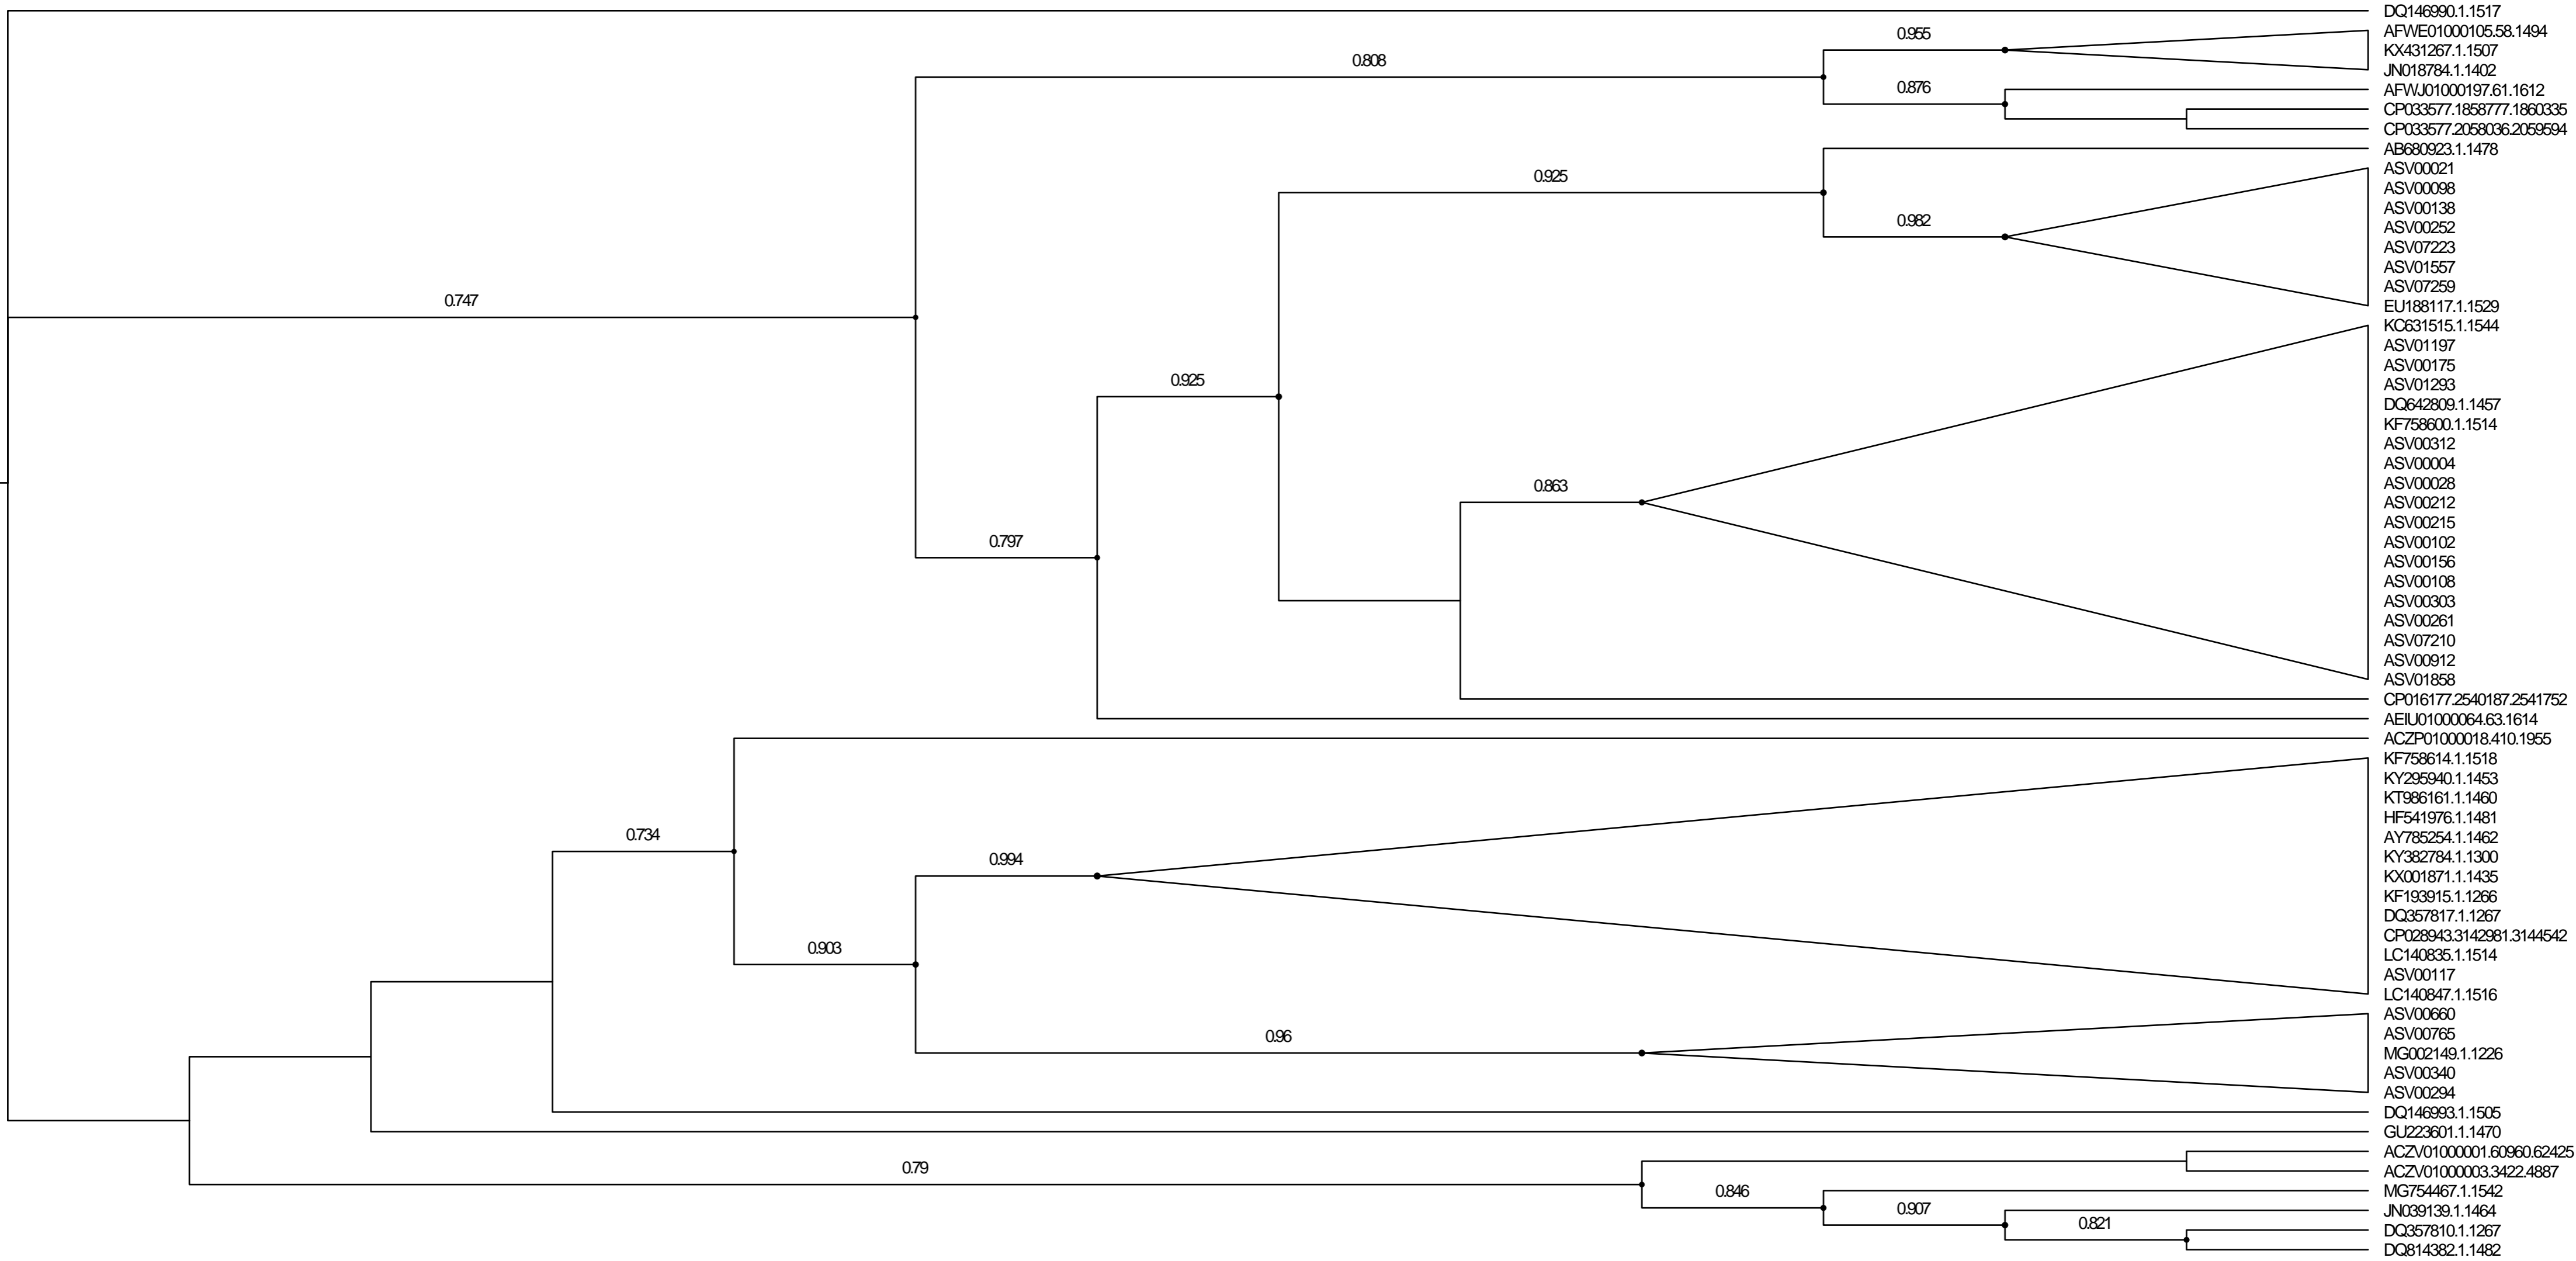

- DQ146990.1.1517
- AFWE01000105.58.1494
- KX431267.1.1507
- JN018784.1.1402
- AFWJ01000197.61.1612
- CP033577.1858777.1860335
- CP033577.2058036.2059594
- AB680923.1.1478
- ASV00021
- ASV00098
- ASV00138
- ASV00252
- ASV07223
- ASV01557
- ASV07259
- EU188117.1.1529
- KC631515.1.1544
- ASV01197
- ASV00175
- ASV01293
- DQ642809.1.1457
- KF758600.1.1514
- ASV00312
- ASV00004
- ASV00028
- ASV00212
- ASV00215
- ASV00102
- ASV00156
- ASV00108
- ASV00303
- ASV00261
- ASV07210
- ASV00912
- ASV01858
- CP016177.2540187.2541752
- AEIU01000064.63.1614
- ACZP01000018.410.1955
- KF758614.1.1518
- KY295940.1.1453
- KT986161.1.1460
- HF541976.1.1481
- AY785254.1.1462
- KY382784.1.1300
- KX001871.1.1435
- KF193915.1.1266
- DQ357817.1.1267
- CP028943.3142981.3144542
- LC140835.1.1514
- ASV00117
- LC140847.1.1516
- ASV00660
- ASV00765
- MG002149.1.1226
- ASV00340
- ASV00294
- DQ146993.1.1505
- GU223601.1.1470
- ACZV01000001.60960.62425
- ACZV01000003.3422.4887
- MG754467.1.1542
- JN039139.1.1464
- DQ357810.1.1267
- DQ814382.1.1482
