# Supplementary material
Source: Research Square preprint supplement (doi:10.21203/rs.3.rs-9577173/v1)

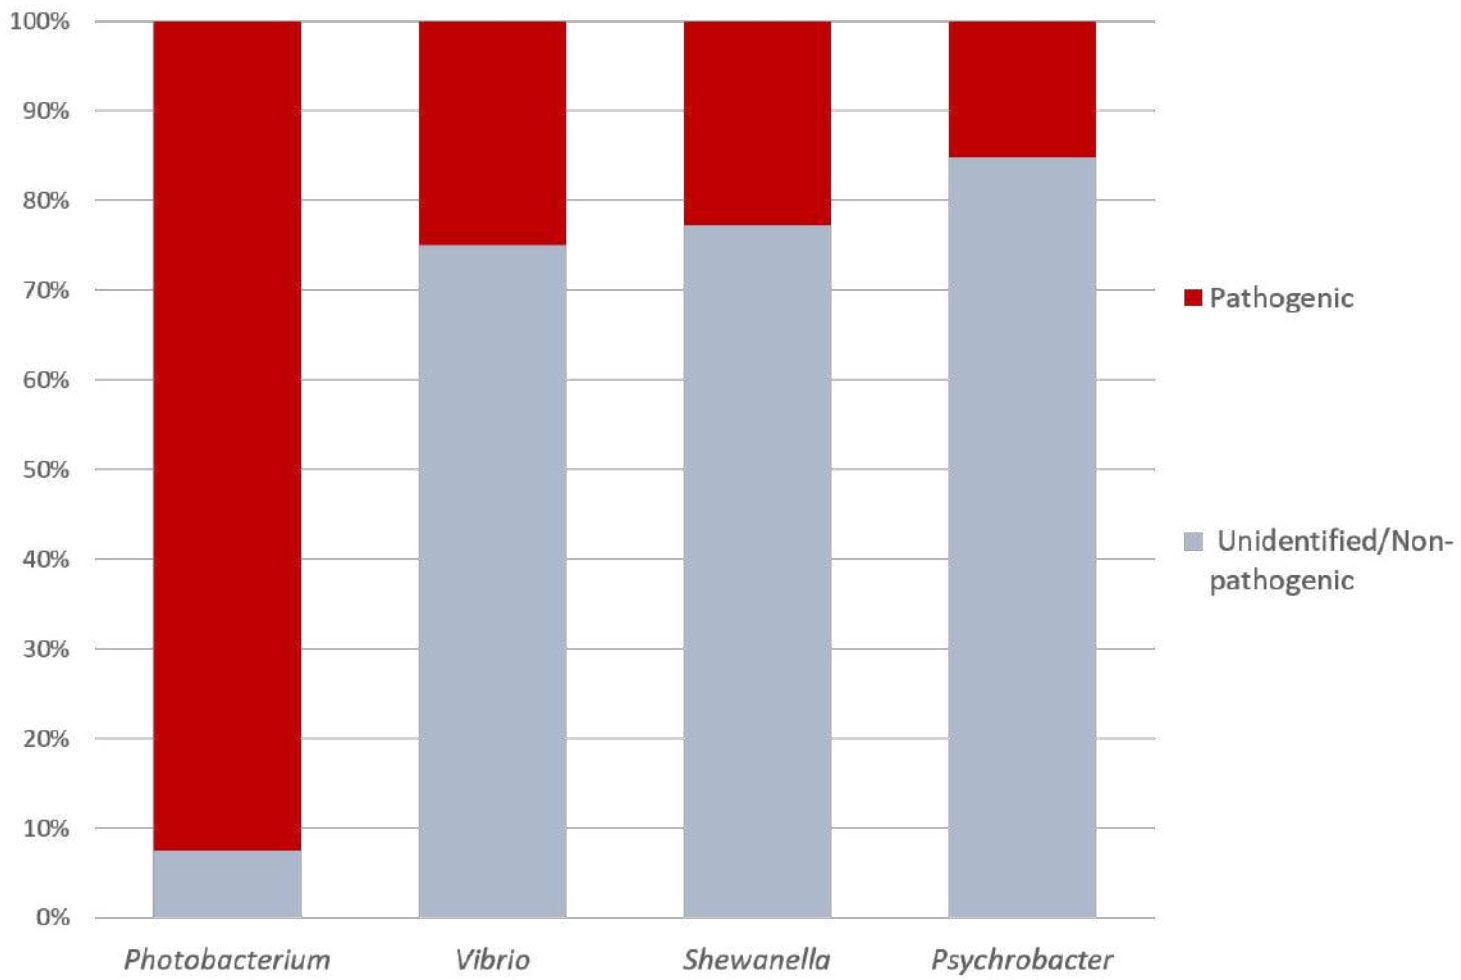

Supplement: Supplementary file 2 [file 0d954dbcc85273e48dff852c.pdf]

Group Individual Pool

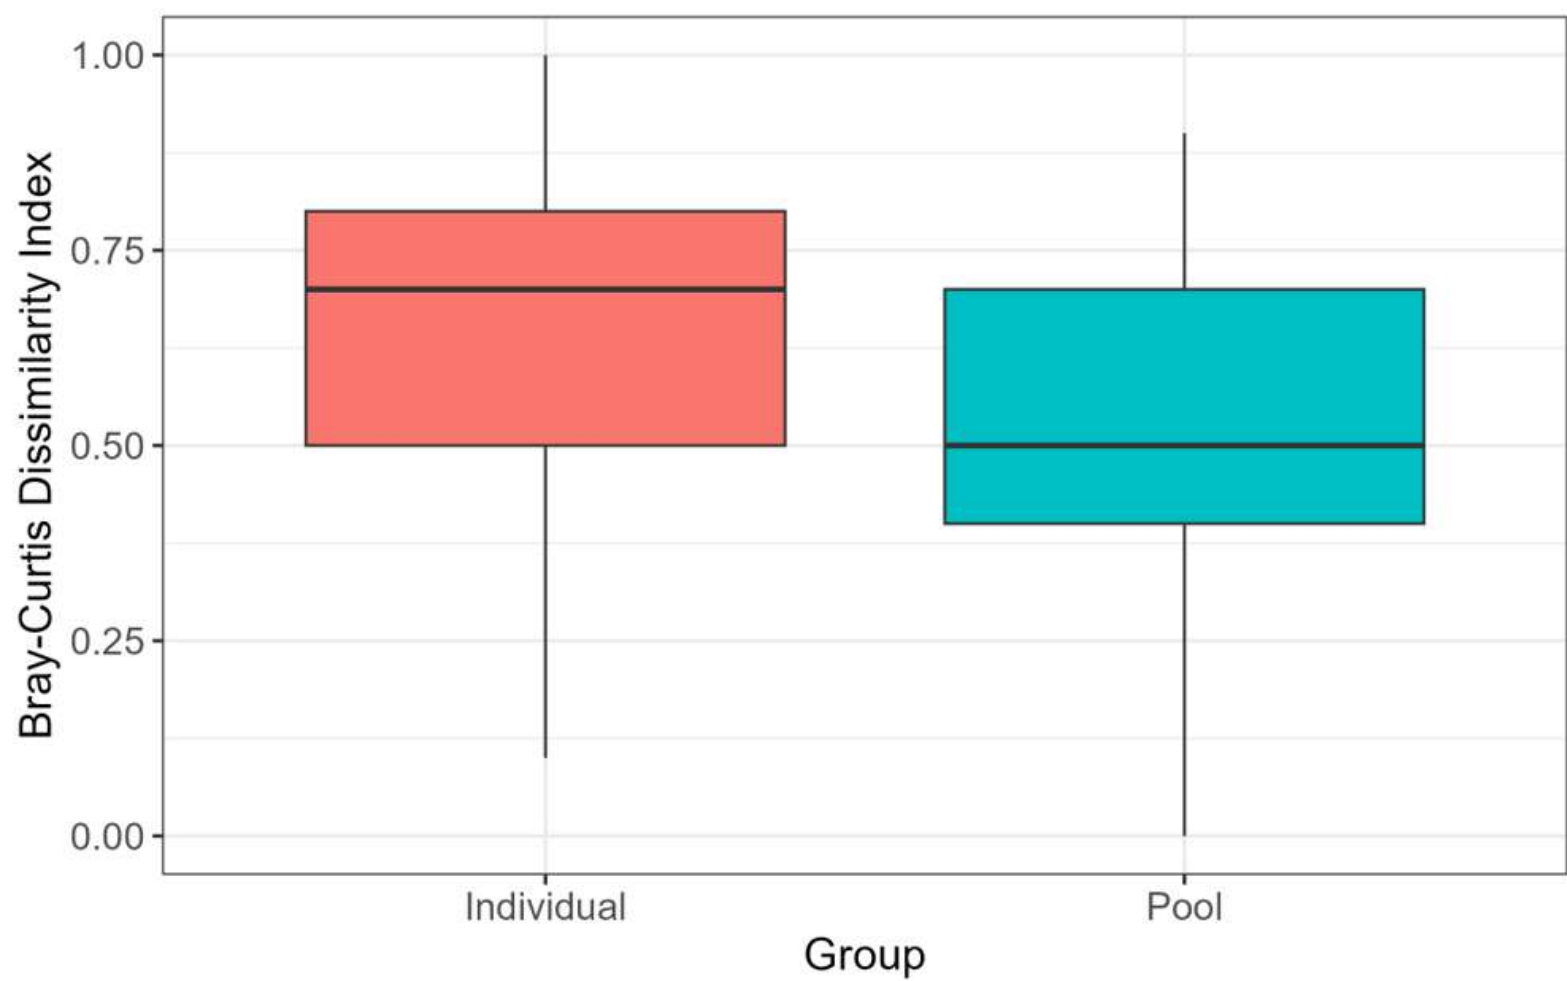

Supplement: Supplementary file 3 [file 17ff38daa1f4e1443416df38.pdf]

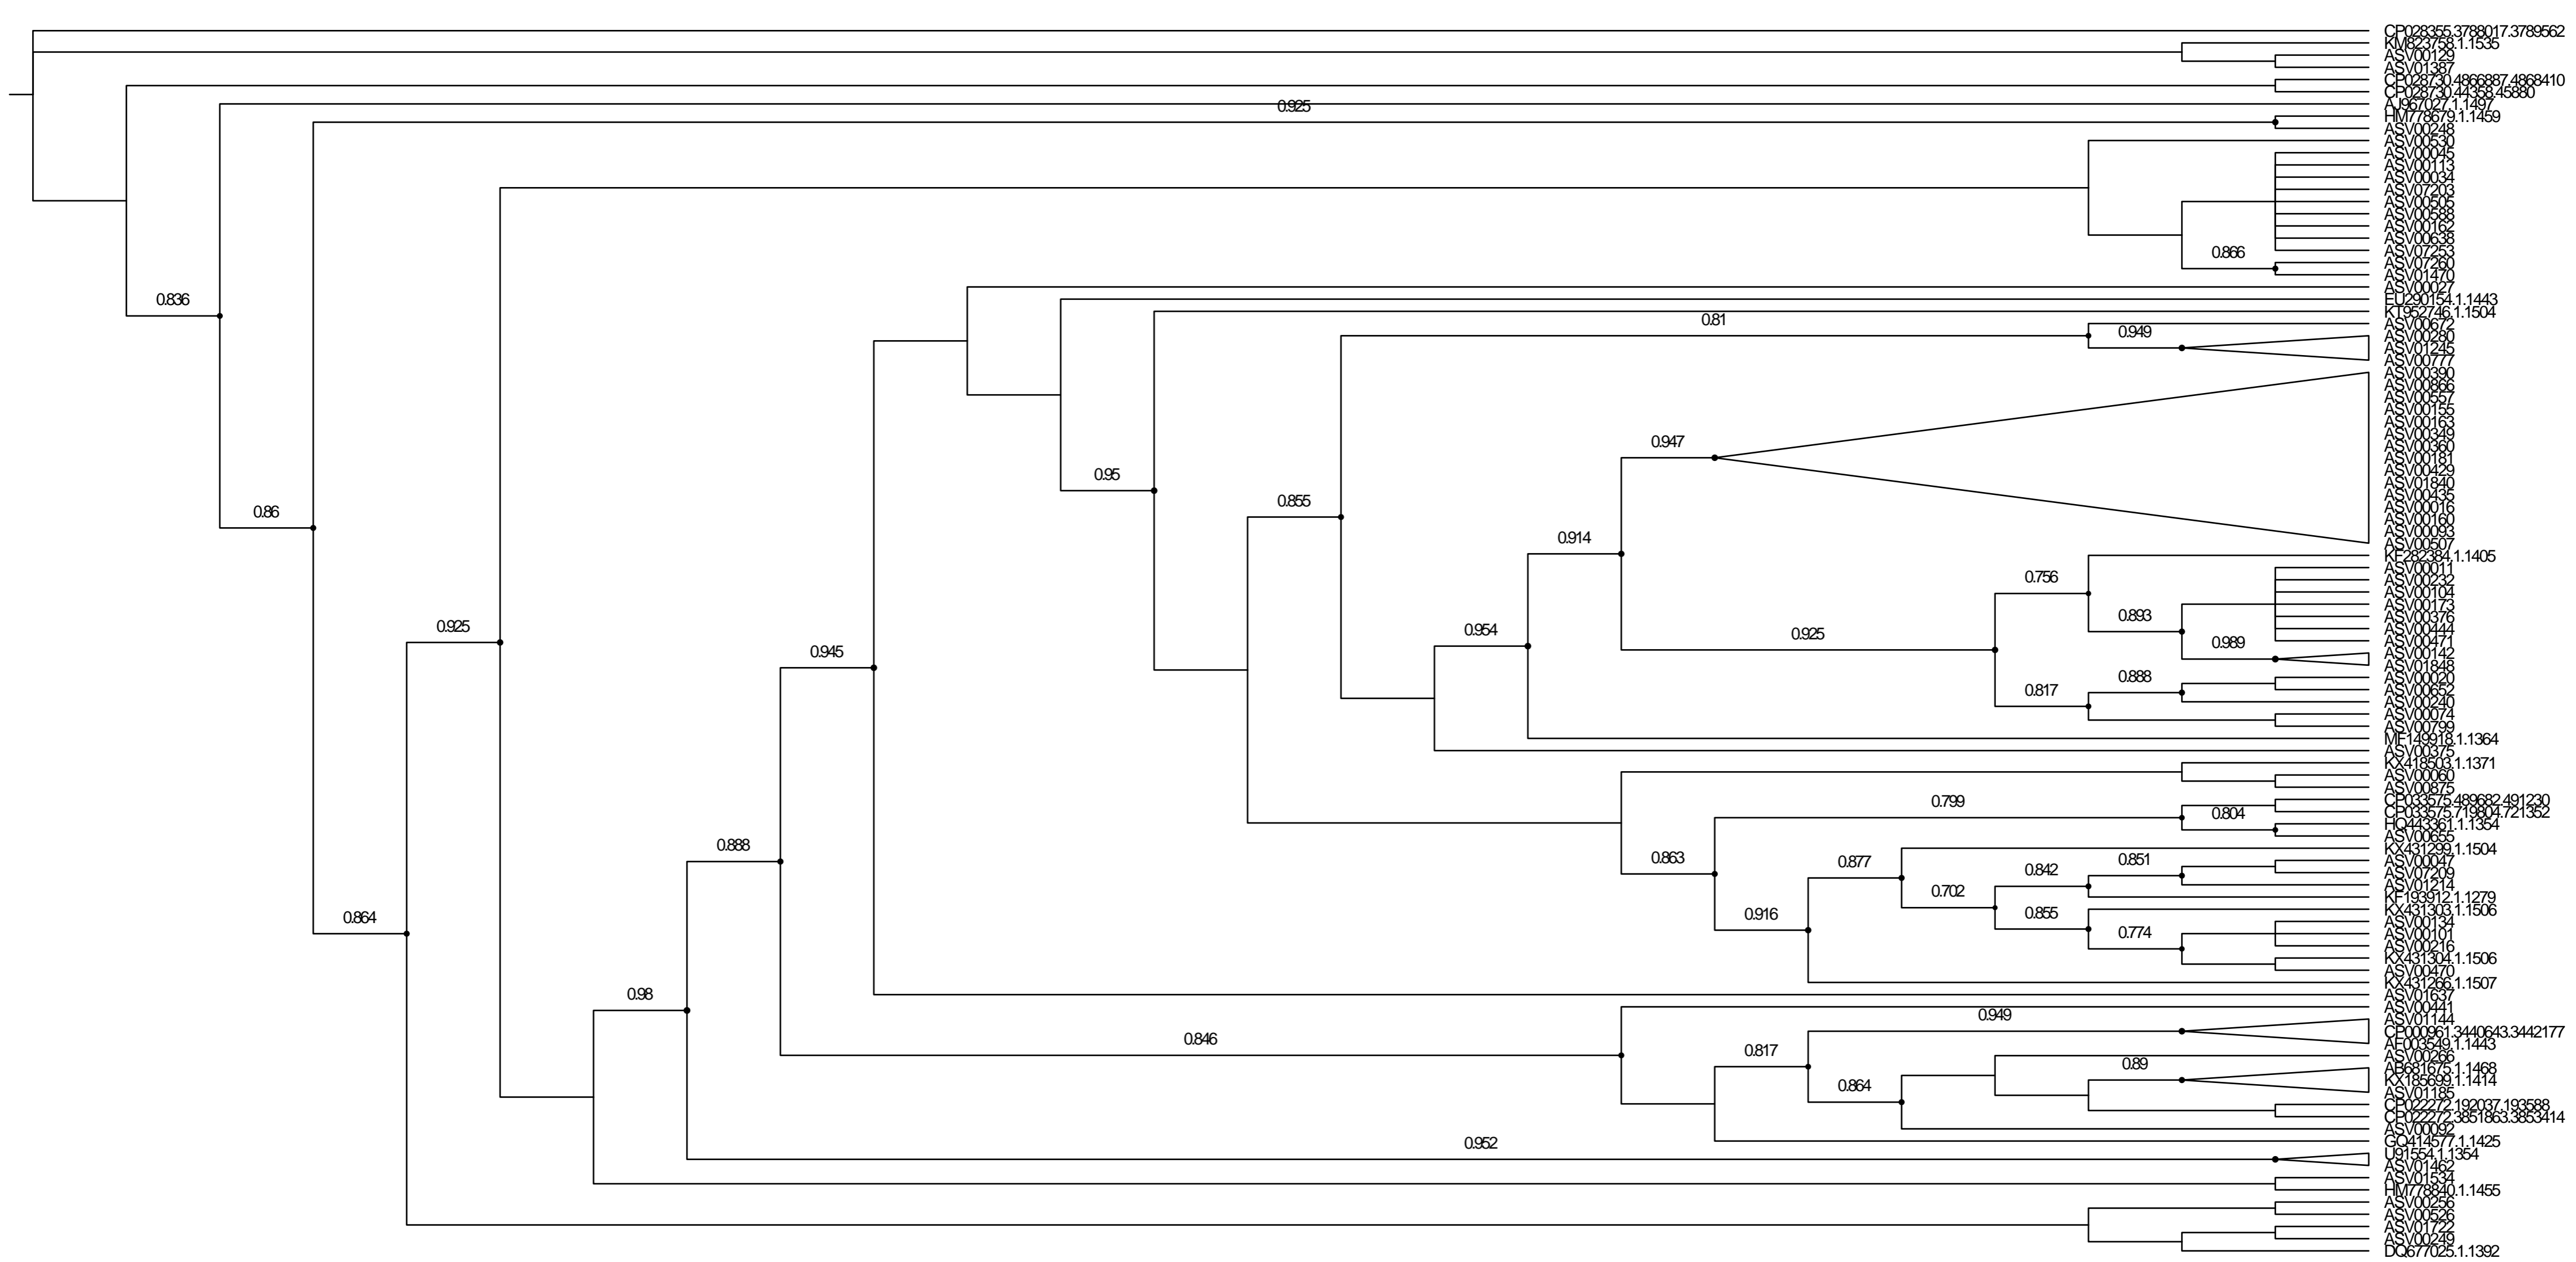

Supplement: Supplementary file 4 [file 1c974f341e2a35edecd82d20.pdf]

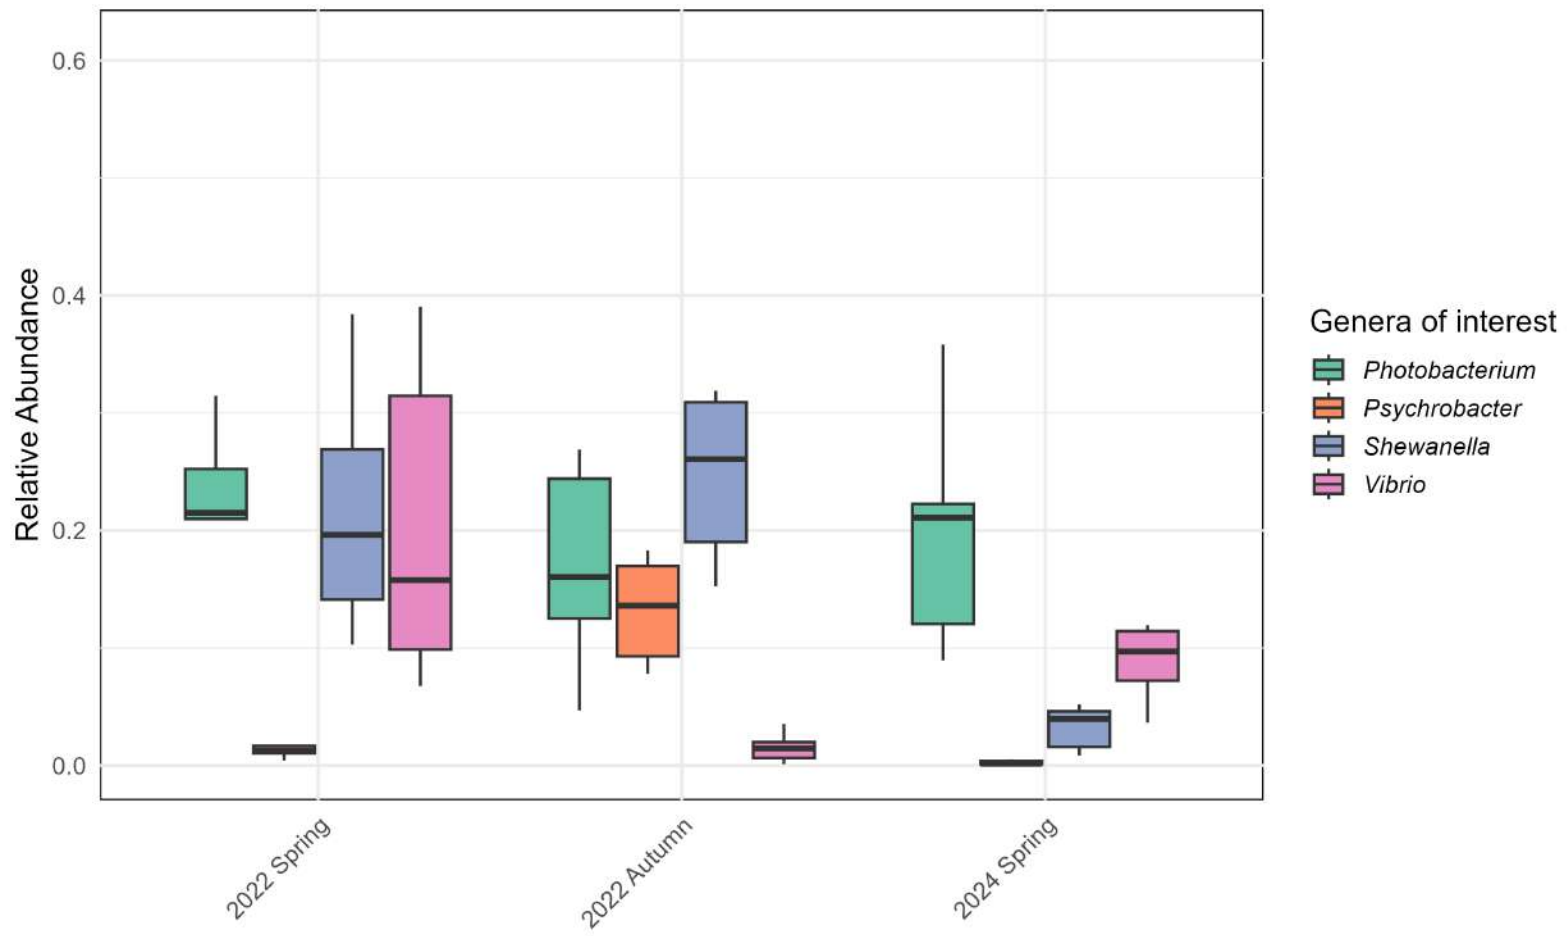

Supplement: Supplementary file 6 [file 3a4ec1d928154ae32bfa2993.pdf]

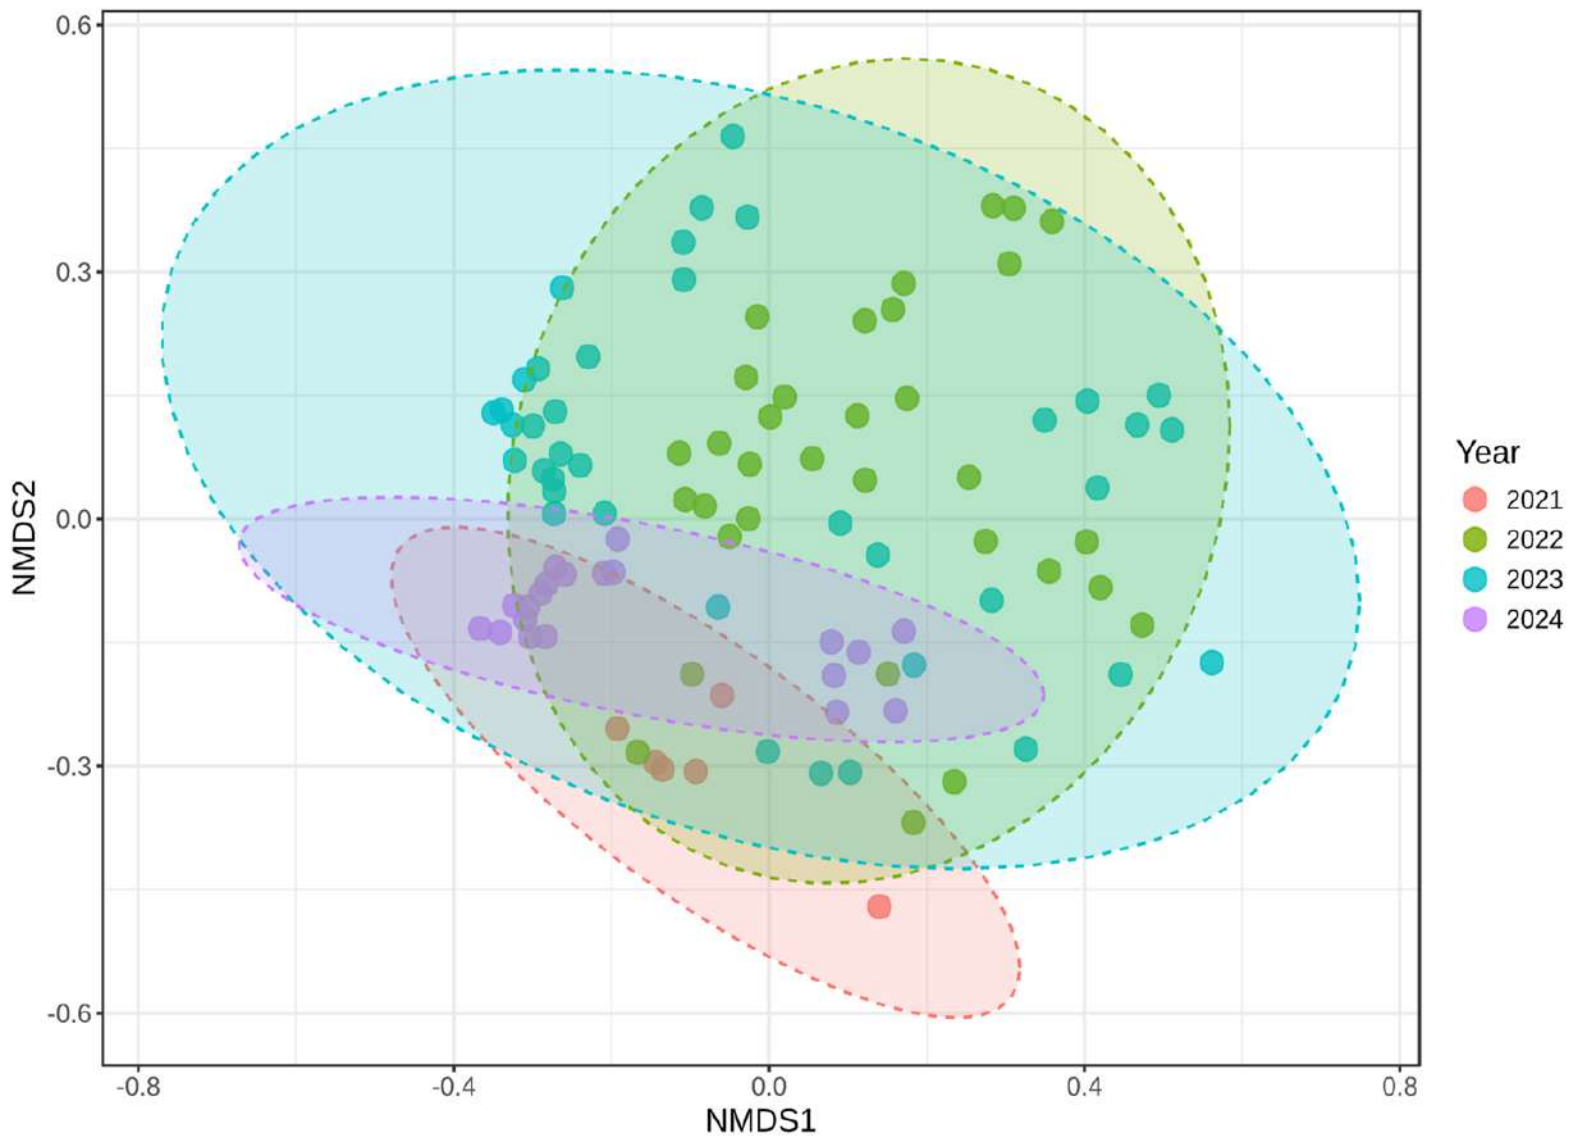

Supplement: Supplementary file 7 [file 3b5ab73680527b056282c0e1.pdf]

Alpha-diversity Index: Shannon

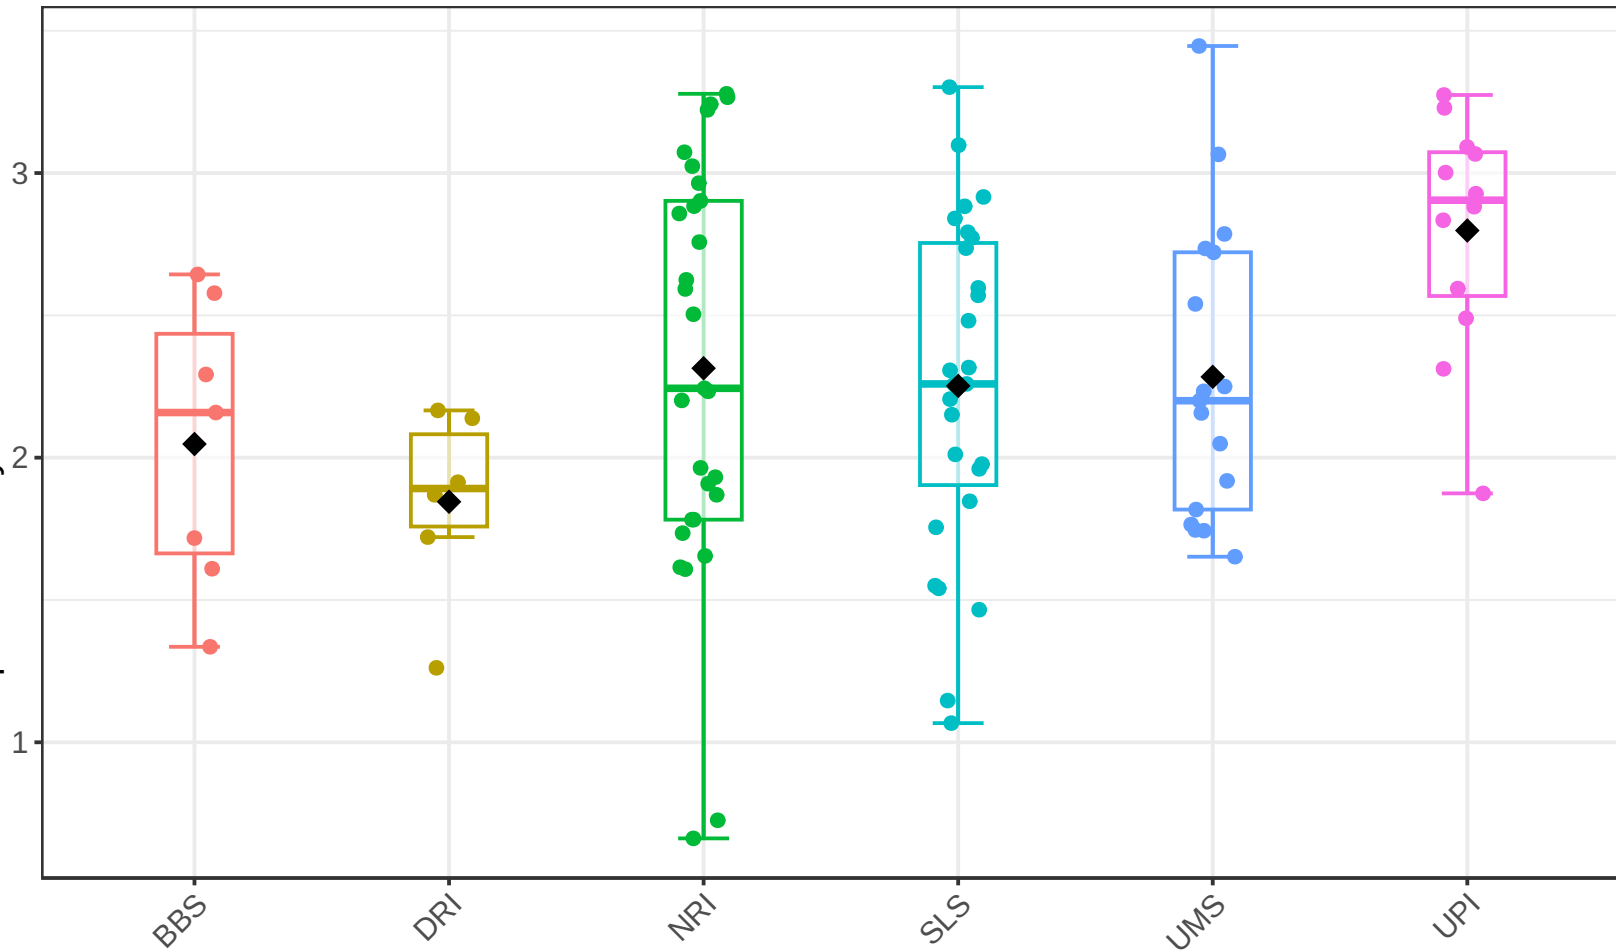

CLASS

BBS

DRI

NRI

SLS

UMS

UPI

Supplement: Supplementary file 9 [file 812f35254ad76701c5ba037f.pdf]

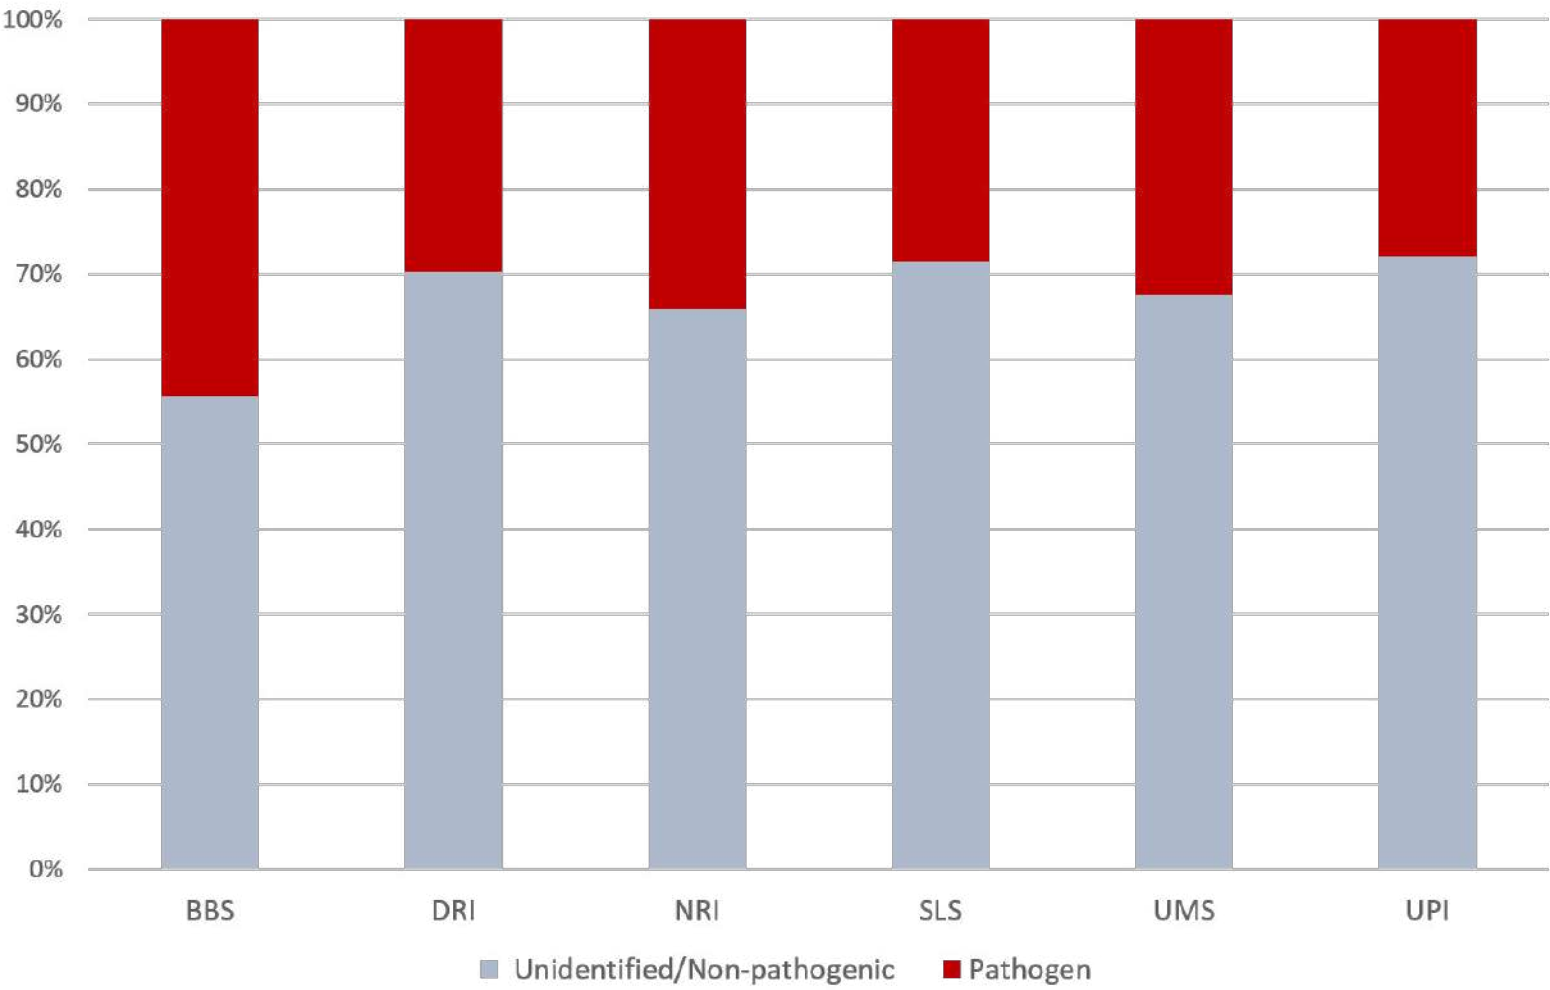

Supplement: Supplementary file 10 [file a21d3d9a3f300624640ec5a6.pdf]

Group Individual Pool

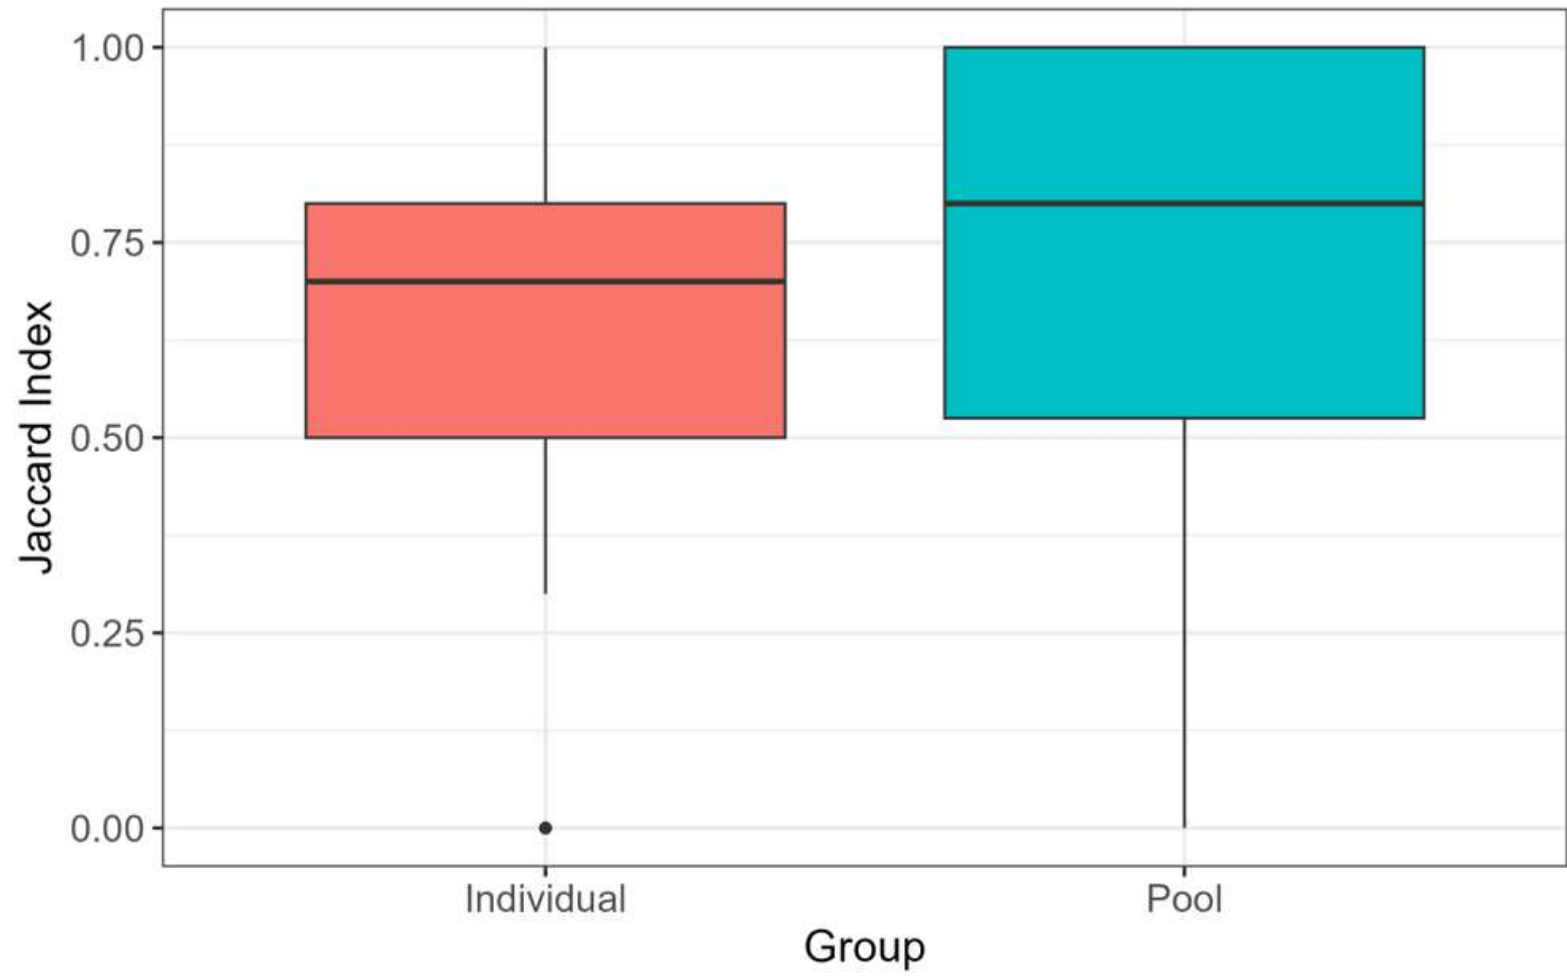

Supplement: Supplementary file 11 [file ad9c63092dace066c8c58e76.pdf]

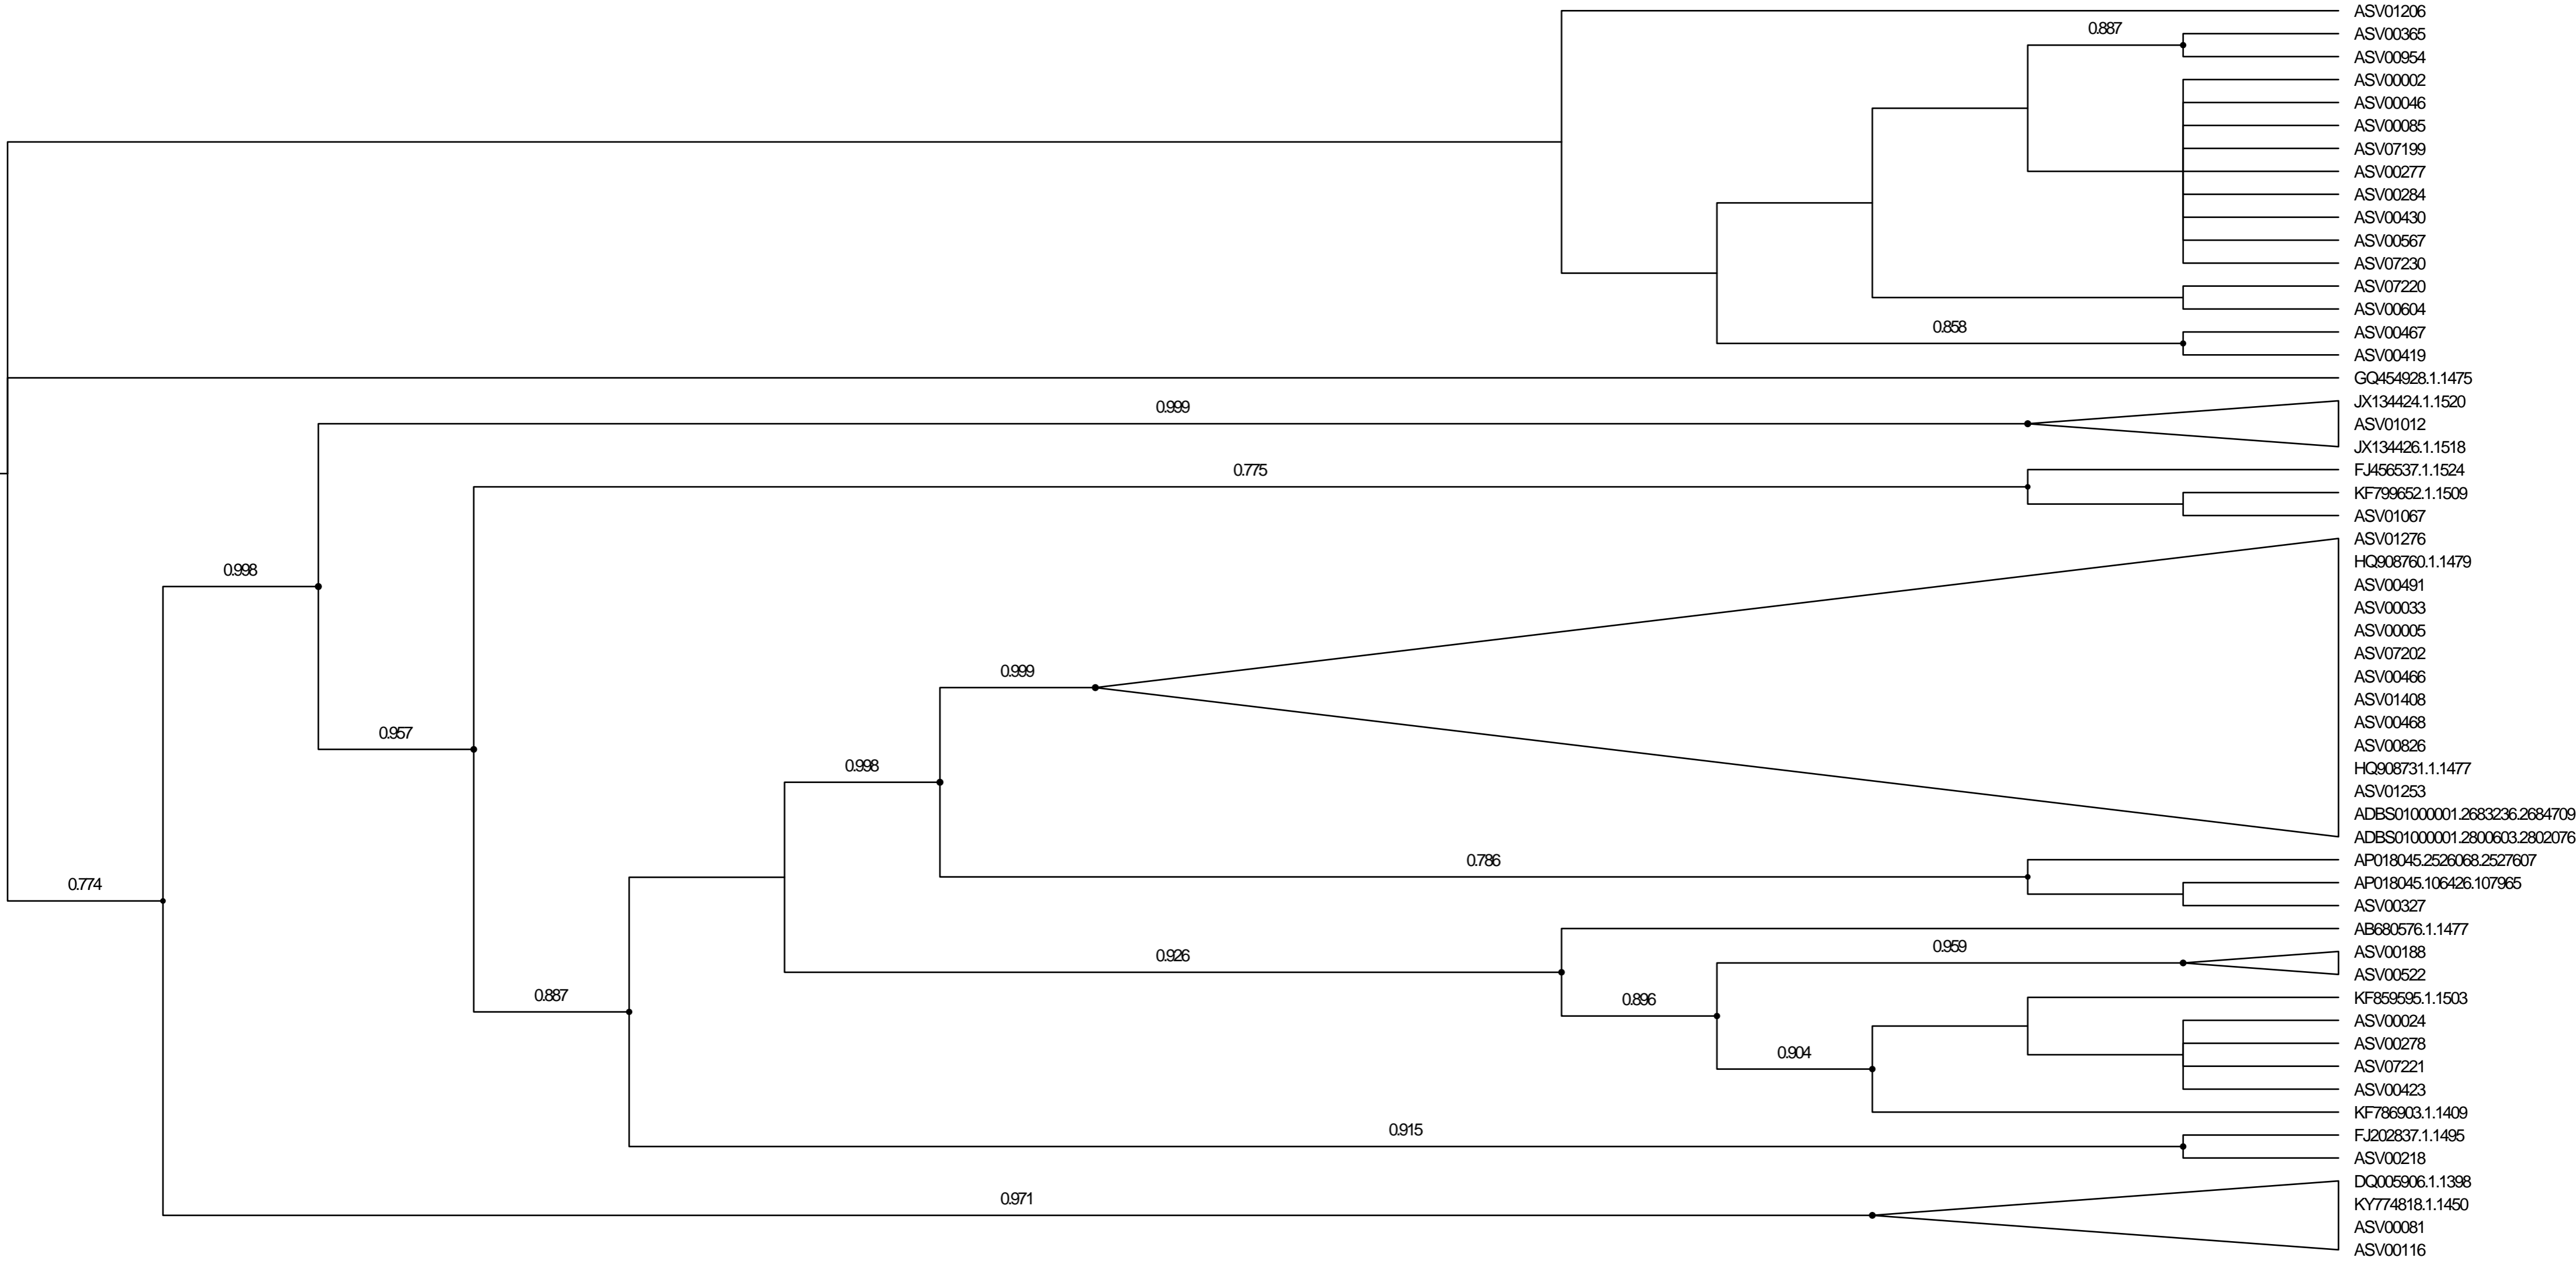

Supplement: Supplementary file 13 [file b14654c6c02a4f7bb4bf3fea.pdf]

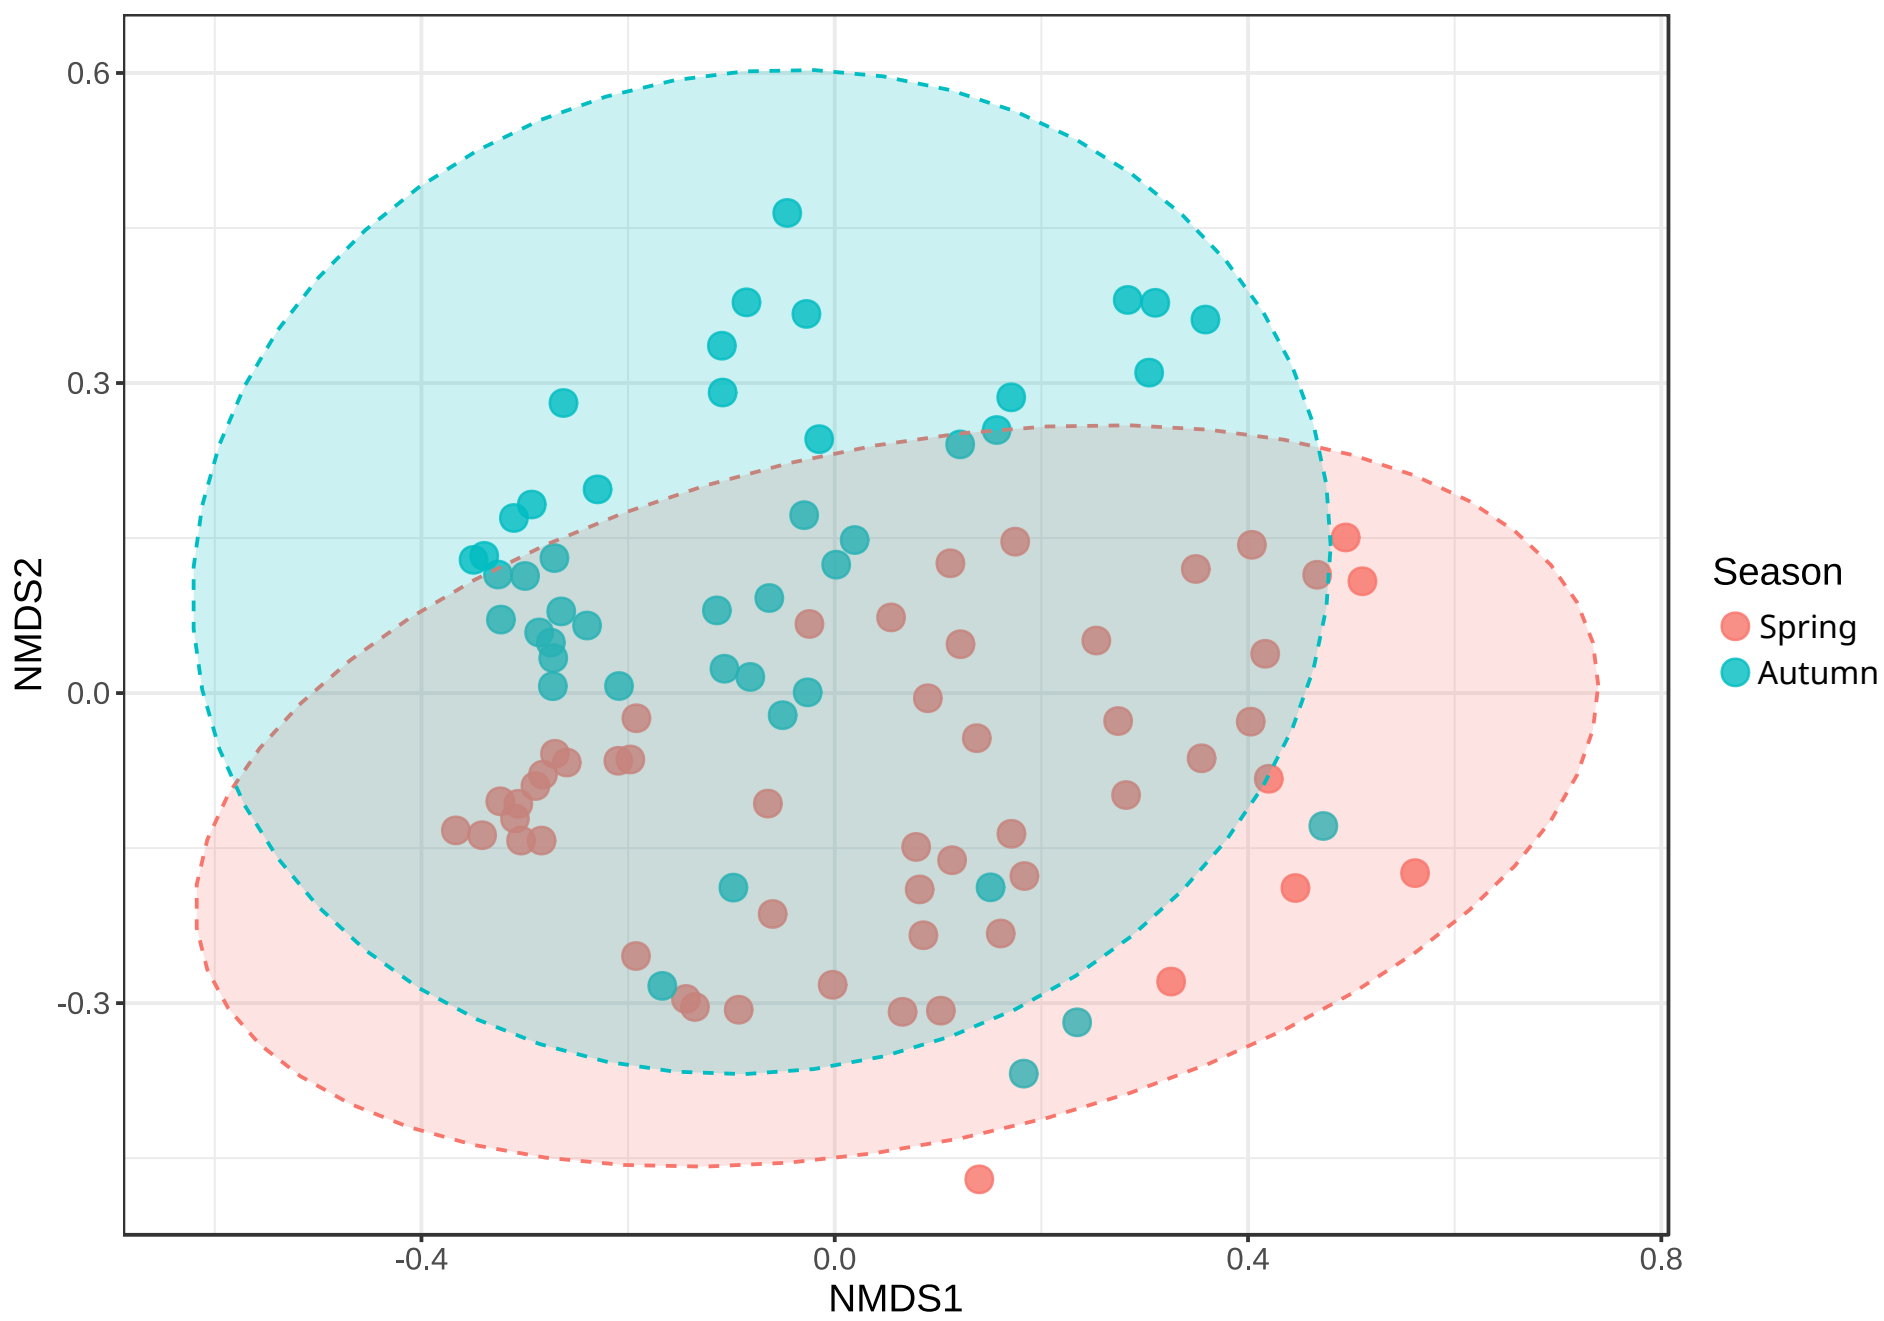

Supplement: Supplementary file 14 [file ce6cf28a2dff9e7a91d6d552.pdf]

Alpha-diversity Index: Simpson

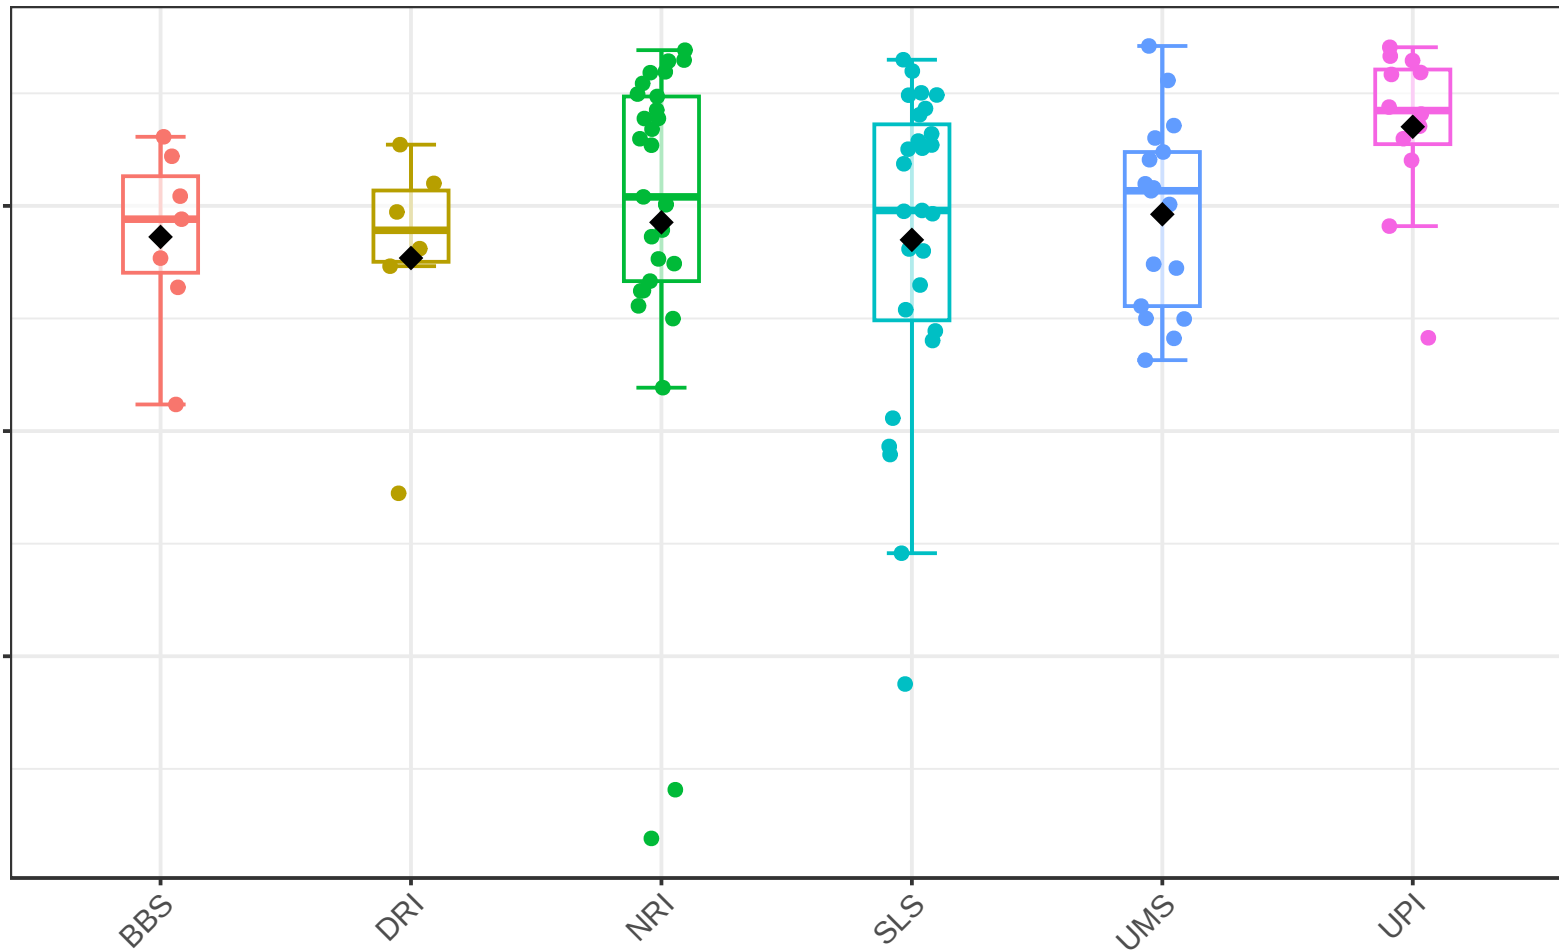

CLASS

BBS

DRI

NRI

SLS

UMS

UPI

Supplement: Supplementary file 15 [file d7dab6a30785c3d5f587923a.pdf]

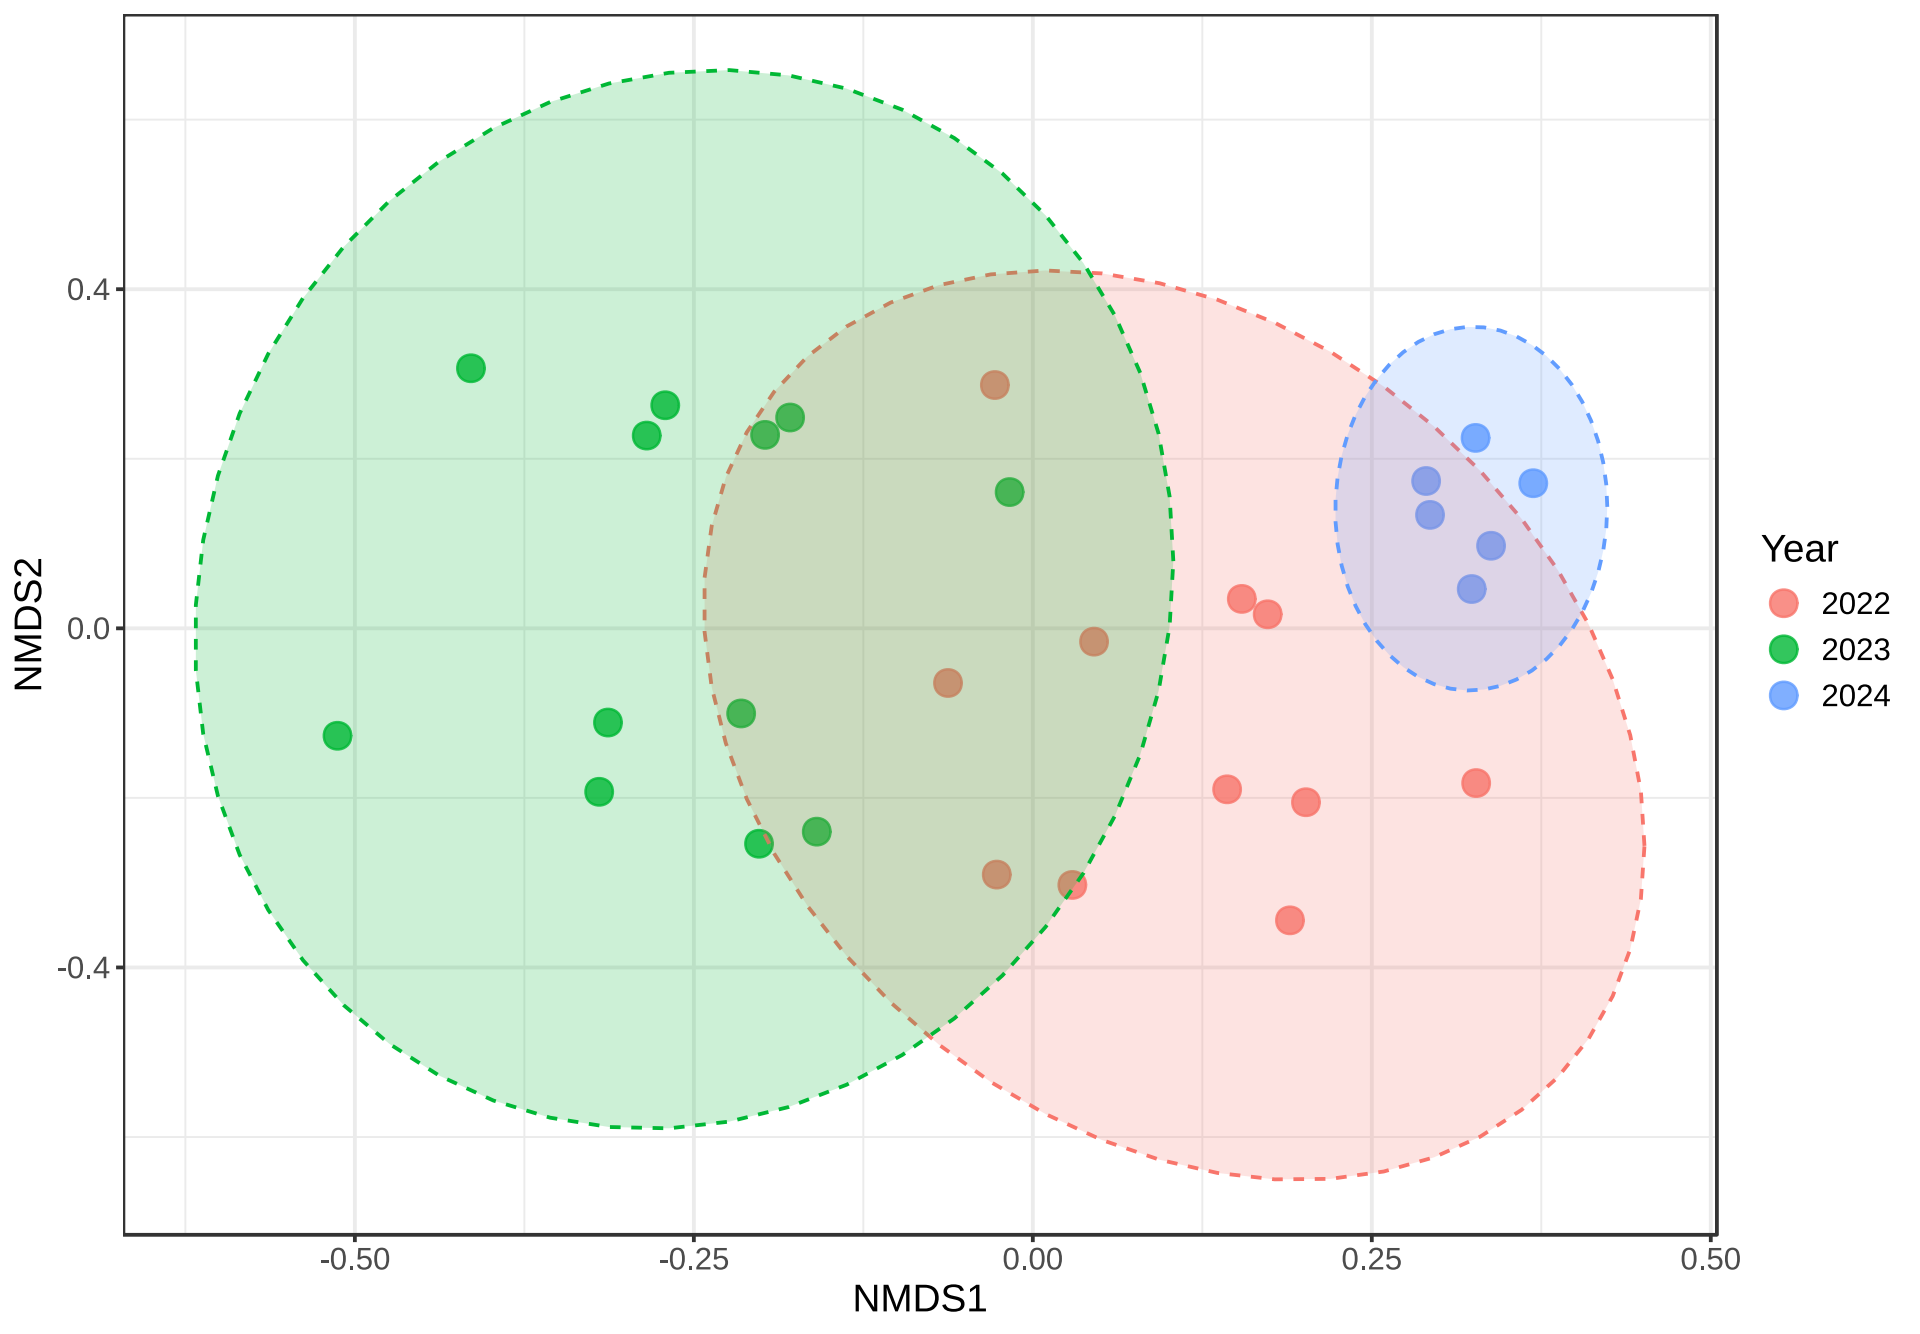

Supplement: Supplementary file 16 [file e5d0389aa786c16fd66b07be.pdf]

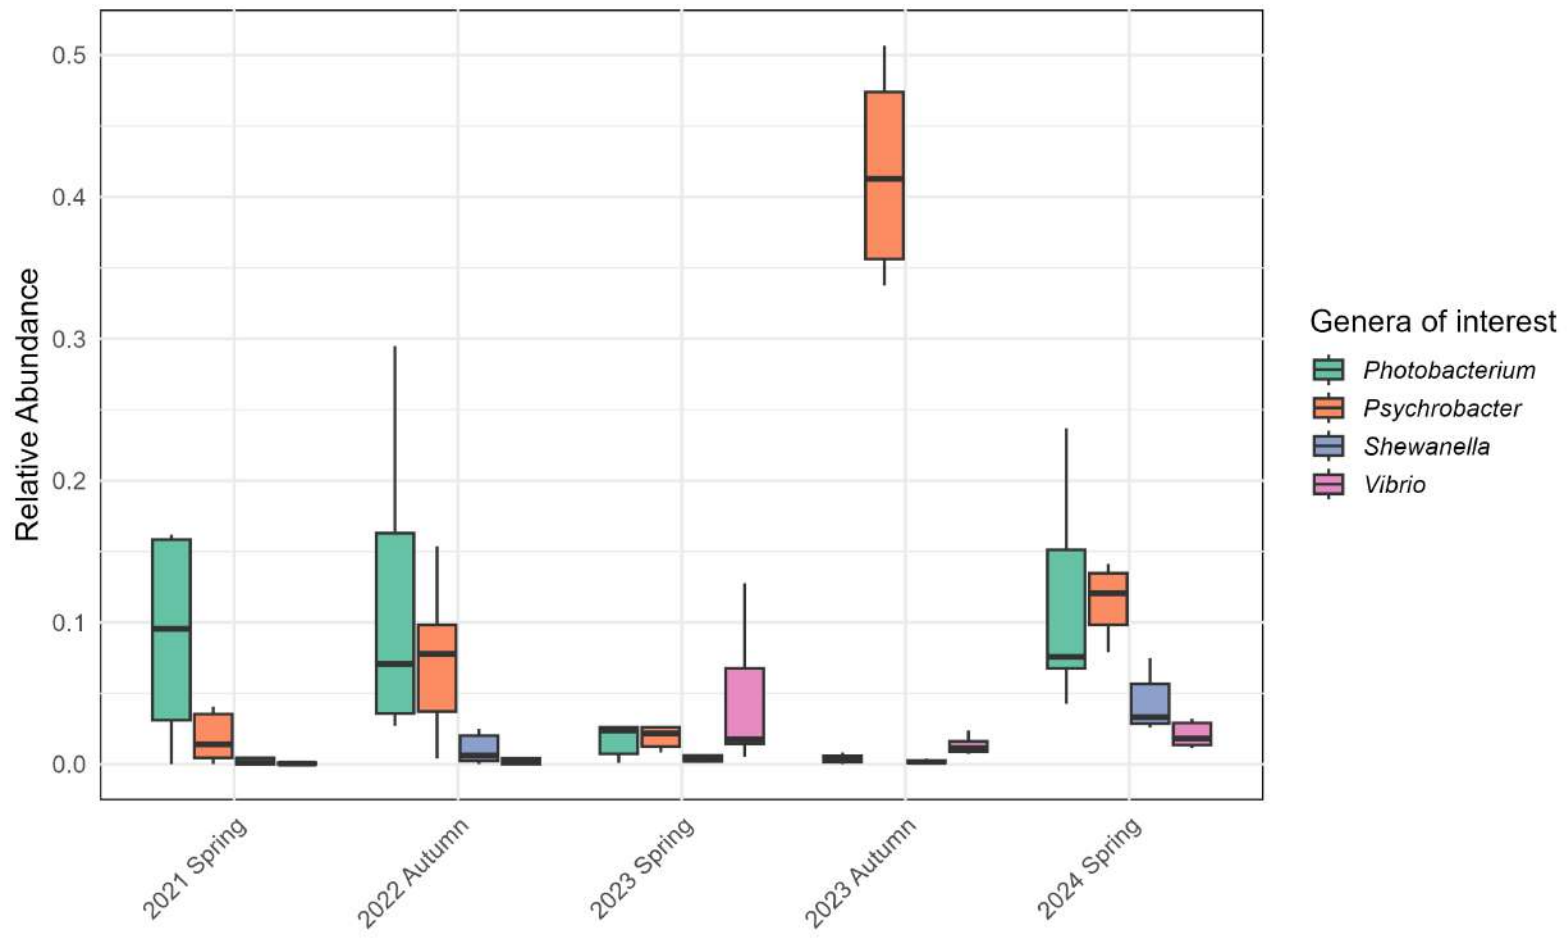

Supplement: Supplementary file 17 [file ed38312eac5e8f62992acd40.pdf]

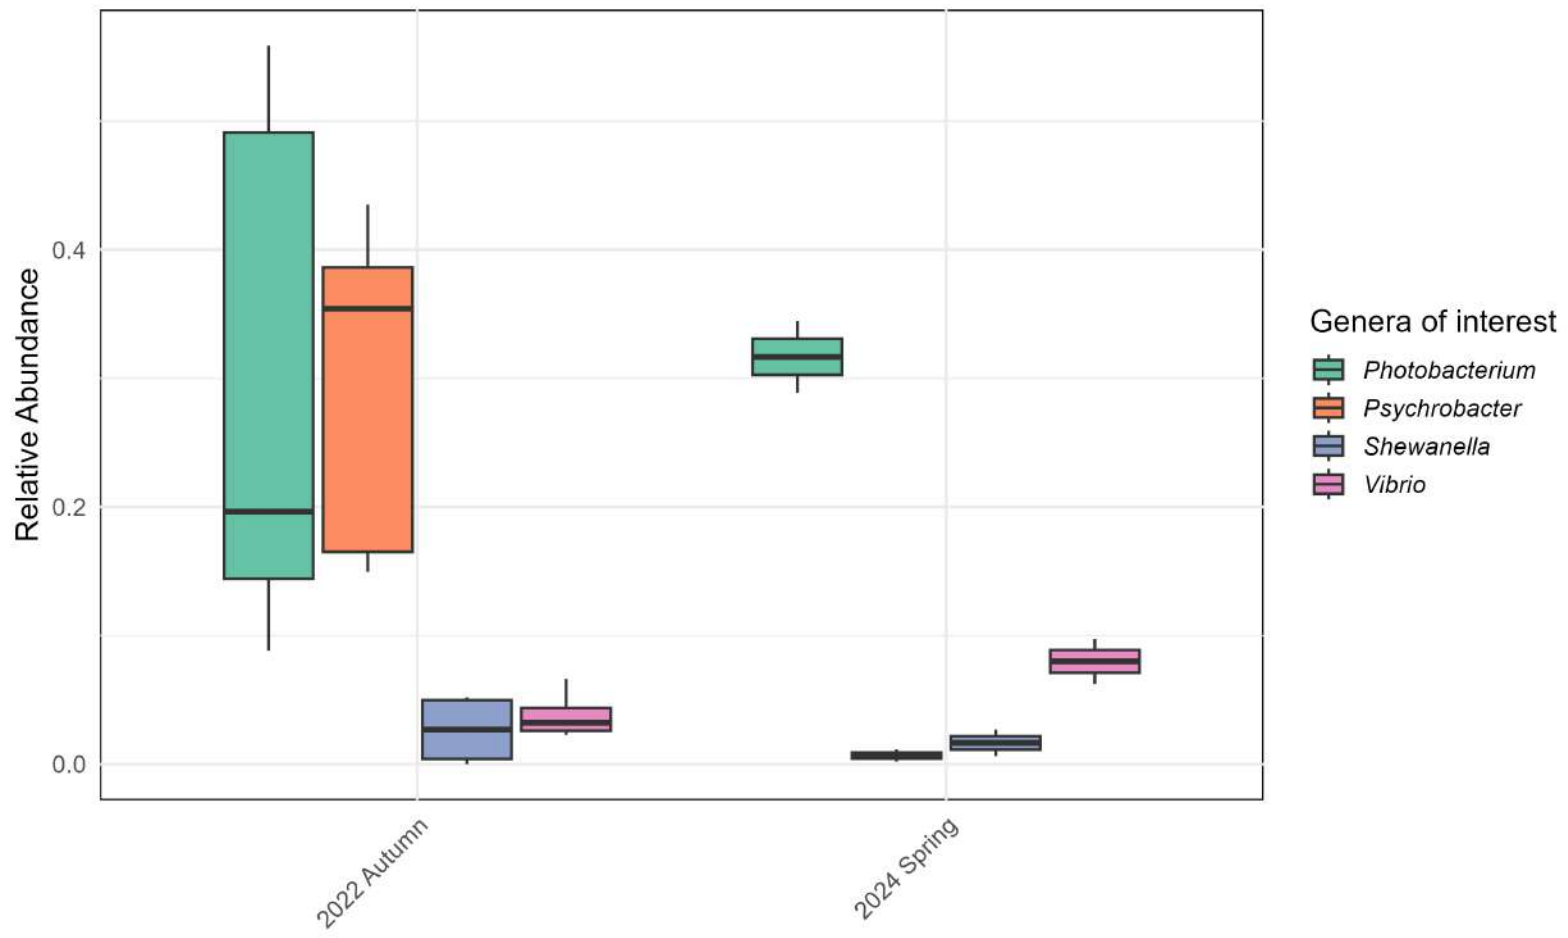

Supplement: Supplementary file 18 [file fe87400203f33d24ef9313cf.pdf]
